# Supplementary material for: Selenium mediated arsenic toxicity modifies cytotoxicity, reactive oxygen species and phosphorylated proteins
Source: Royal Society of Chemistry journal article supplement (doi:10.1039/c3mt20213e), 2013-01-01
Supplement: c3mt20213e.pdf [file c3mt20213e.pdf]

## Electronic Supplement for:

### Studies of Cell Signaling, Reactive Oxygen Species and Cytotoxicities Allow Enhanced Molecular Level Understanding of Selenium Mediated Arsenic Toxicity

by

Karnakar R. Chitta, Julio A. Landero, Joseph A. Caruso\* Edward J. Merino  
University of Cincinnati/ Agilent Technologies Metallomics Center of the Americas  
Department of Chemistry, University of Cincinnati, Cincinnati, OH 45221-0172, USA

\* corresponding author – [joseph.caruso@uc.edu](mailto:joseph.caruso@uc.edu)

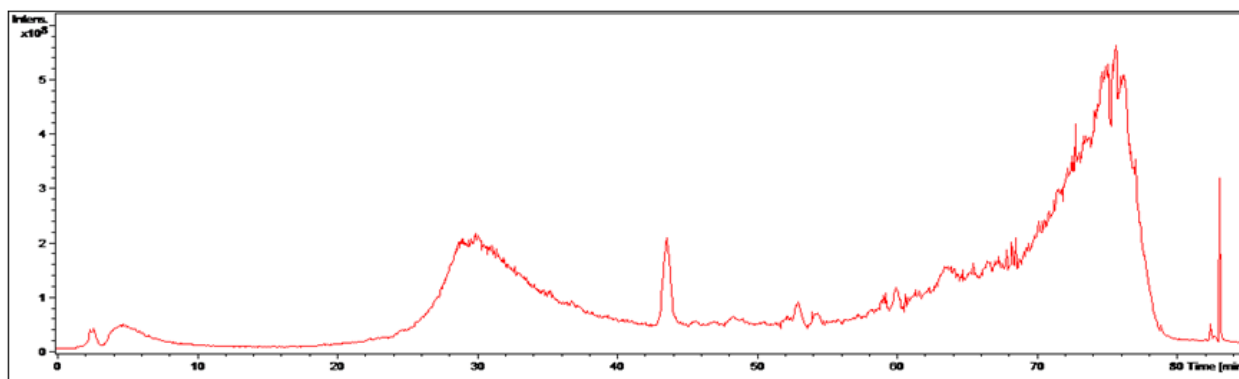

**Figure S1a:** A figure showing the total ion chromatogram ( $\beta$ -casein peptide) representing intensity (y-axis) vs time (x-axis). Loading and peptide trapping was performed at a flow rate of  $4 \mu\text{L}/\text{min}$  using 0.6% acetic acid (HOAc) and 2% formic acid (FA) in water. Solvents used for the nanoflow experiment were 0.6% HOAc/0.5% FA (solvent A) and 0.6% HOAc/0.5% FA/80% acetonitrile (ACN) (solvent B). Samples were loaded on-to the enrichment column at a flow rate of  $3 \mu\text{L} \text{min}^{-1}$  with a 97:3 ratio of solvent A (0.1% FA (v/v) in water) and B (90% ACN, 0.1% FA (v/v) in water). After the enrichment column was loaded, the on-chip microfluidics switched to the analytical column at a flow rate of  $0.3 \mu\text{L} \text{min}^{-1}$ . Gradient: 0–2 min, 2% B; 5–50 min,

40% B; 50–60 min, 70% B; 60–70 min, 90% B; 70–90 min, 0% B.

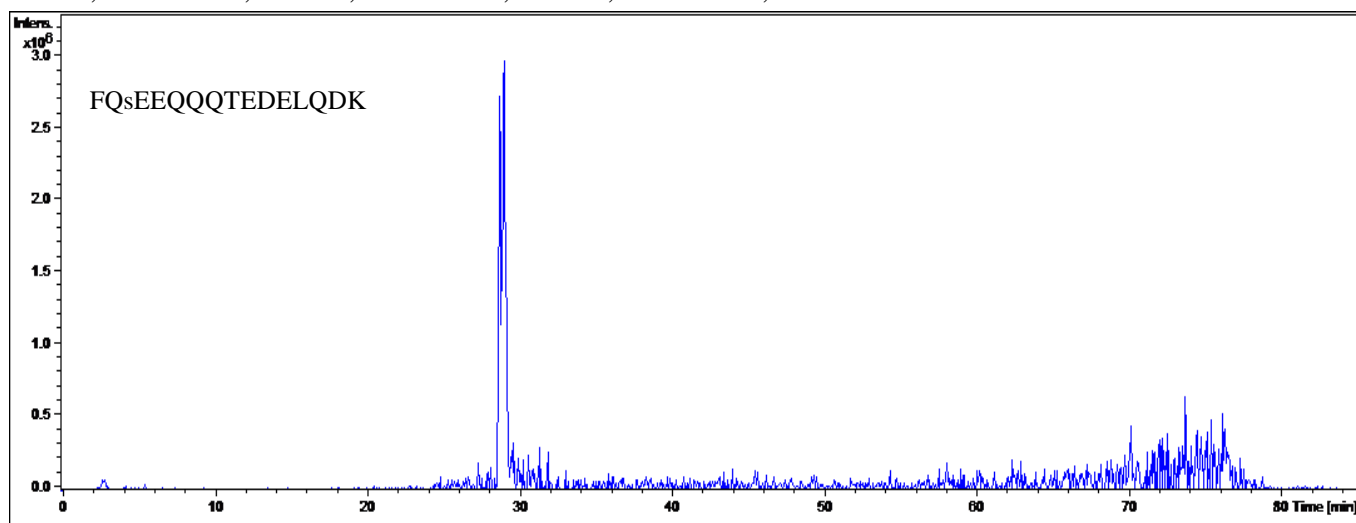

**Figure S1b:** A figure of an extracted ion chromatogram for the  $\beta$ -casein peptide containing intensity (y-axis) vs time (x-axis).

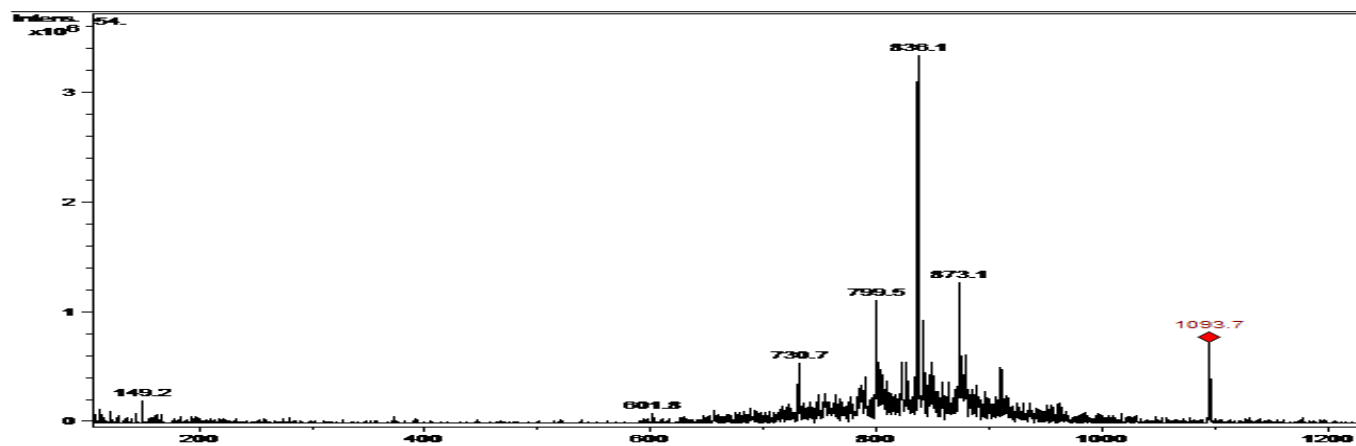

**Figure S1c:** A figure showing the mass spectra of  $\beta$ -casein peptide ( $m/z$ -1093.7) at the red diamond.

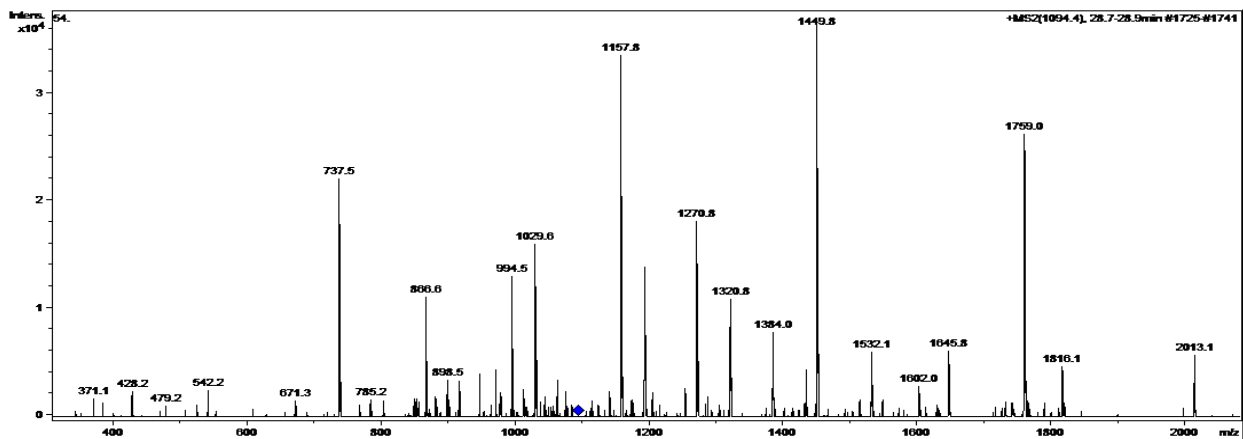

**Figure S1d:** A figure showing the MS/MS of the m/z-1093.7.

| Data Base     | Parent charge | score | sequence                      | Matched parent mass | Accession number | Entry name  |
|---------------|---------------|-------|-------------------------------|---------------------|------------------|-------------|
| Spectrum Mill | 2             | 19.74 | (R)DMPIQAFLLYQEPVL<br>GPVR(G) | 2186.16             | P02666           | Beta-casein |
| Mascot        | 2             | 90.84 | (R)DMPIQAFLLYQEPVL<br>GPVR(G) | 2186.86             | P02666           | Beta-casein |

**Table S1:** Shows the identification of Beta-casein using Spectrum Mill data base

| No | Charge | Score | Peptide Intensity | Total Intensity | Sequence                                        | Modifications                                | Matched parent mass | Accession number | Entry name                                                     | Variable Sites found in the study | UniprotKB Reported Variable Sites     |
|----|--------|-------|-------------------|-----------------|-------------------------------------------------|----------------------------------------------|---------------------|------------------|----------------------------------------------------------------|-----------------------------------|---------------------------------------|
| 1  | 2      | 16.67 | 86.8              | 4980063         | (R)FQVWD<br>YEEGEVEA<br>LLDR(Y)                 |                                              | 2097.976            | O43598           | Deoxyribonucleoside 5'-<br>monophosphate N-<br>glycosidase     | NR                                | S : 12, 28,<br>169                    |
| 2  | 3      | 11.01 | 81.8              | 1319656<br>3    | (K)DQFPEV<br>YVPTVFEN<br>YVADIEVD<br>GK(Q)      |                                              | 2773.324            | P61586           | Transforming protein<br>RhoA                                   | NR                                | S : 34, 37,<br>156                    |
| 3  | 3      | 10.18 | 79.9              | 8300444         | (K)TLRLVN<br>LEYNQLtF<br>PKALCFLP<br>K(L)       | C:Carbamidomethylation<br>t:Phosphorylated T | 2879.585            | A4D1F6           | Leucine-rich repeat and<br>death domain-<br>containing protein | T : 293,<br>294                   | NR                                    |
| 4  | 3      | 10.07 | 88.7              | 6941975         | (R)YLLQYQ<br>EPIPCEQL<br>VTALCDIK(<br>Q)        | C:Carbamidomethylation                       | 2694.352            | P25789           | Proteasome subunit<br>alpha type-4                             | NR                                | S : 13, 75                            |
| 5  | 3      | 9.9   | 68.4              | 4812443         | (R)ssNYEIT<br>GHEEGYFT<br>AIMLKK(S)             | s:Phosphorylated S                           | 2531.249            | O95551           | Tyrosyl-DNA<br>phosphodiesterase 2                             | S : 195,<br>196                   | NR                                    |
| 6  | 3      | 9.1   | 78.5              | 3489902         | (R)EQPAPN<br>HRGsLPVt<br>IFSGPKHSR<br>(S)       | t:Phosphorylated<br>T<br>s:Phosphorylated S  | 2613.364            | Q9P2P6           | StAR-related lipid<br>transfer protein 9                       | S : 3219<br>T : 3223              | NR                                    |
| 7  | 3      | 8.81  | 64.9              | 5251199         | (K)ALNTtDs<br>SSPSLADG<br>IDTSGGGSI<br>HVISR(D) | t:Phosphorylated<br>T<br>s:Phosphorylated S  | 2902.403            | P49116           | Nuclear receptor<br>subfamily 2 group C<br>member 2            | T : 323 S:<br>325                 | S : 19, 46,<br>55, 68, 219<br>T : 224 |
| 8  | 3      | 7.87  | 64.1              | 8633731         | (R)sPIPIRV<br>ETAQPAVE<br>KPEIKPPR<br>VR(K)     | s:Phosphorylated S                           | 2807.625            | Q9H329           | Band 4.1-like protein<br>4B                                    | S : 650                           | NR                                    |
| 9  | 3      | 7.82  | 82.4              | 5297382         | (K)MCLYF<br>GsAFATPFL<br>VVRHQLL<br>KT(-)       | C:Carbamidomethylation<br>s:Phosphorylated S | 2699.42             | P15954           | Cytochrome c oxidase<br>subunit 7C,<br>mitochondrial           | S : 47                            | NR                                    |
| 10 | 3      | 7.67  | 88                | 3363724         | (R)IAAQDL<br>LLAVATDF<br>QNESAAAL<br>AAAATR(H)  |                                              | 2786.468            | Q96P70           | Importin-9                                                     | NR                                | NR                                    |

|    |   |      |      |         |                                                      |                                                                       |          |        |                                                                     |                    |                                                                                                       |
|----|---|------|------|---------|------------------------------------------------------|-----------------------------------------------------------------------|----------|--------|---------------------------------------------------------------------|--------------------|-------------------------------------------------------------------------------------------------------|
| 11 | 3 | 7.4  | 60.4 | 6291673 | (K)ASKEPV<br>GCVNNsFL<br>ASLAGStSR<br>NR(L)          | C:Carbamidomethylation<br>t:Phosphorylated<br>T<br>s:Phosphorylated S | 2735.389 | Q86XD8 | AN1-type zinc finger<br>and ubiquitin domain-<br>containing protein | S : 568<br>T : 577 | NR                                                                                                    |
| 12 | 3 | 7.26 | 83.9 | 5962927 | (R)LQAFFts<br>DTGLEYES<br>PKLYPAIP<br>AAR(R)         | t:Phosphorylated<br>T<br>s:Phosphorylated S                           | 2869.477 | Q9UBC3 | DNA (cytosine-5)-<br>methyltransferase                              | S : 552 T<br>: 551 | NR                                                                                                    |
| 13 | 3 | 7.25 | 100  | 2641592 | (R)IDKAPSF<br>TsQDFHGD<br>VNLLK(E)                   | s:Phosphorylated S                                                    | 2232.13  | Q8NHP7 | Exonuclease 3'-5'<br>domain-containing<br>protein 1                 | S : 370            | NR                                                                                                    |
| 14 | 3 | 7.11 | 91.2 | 1798411 | (K)RISDSEV<br>sDYDCDDG<br>IGVVS DYR<br>HDGR(D)       | C:Carbamidomethylation<br>s:Phosphorylated S                          | 3087.334 | Q9UQ26 | Regulating synaptic<br>membrane exocytosis<br>protein 2             | S : 973            | S : 366, 400,<br>427, 429,<br>1030, 1038<br>T : 973                                                   |
| 15 | 3 | 7.01 | 85.8 | 5178341 | (R)LLGAYL<br>FIISRVQGG<br>NLDSMLH<br>GtGMK(S)        | t:Phosphorylated T                                                    | 2962.564 | P36894 | Bone morphogenetic<br>protein receptor type-<br>1A                  | T : 42             | S : 215, 216,<br>218, 220                                                                             |
| 16 | 3 | 6.84 | 62   | 3161782 | (R)GSYTEK<br>DAsHLVGQ<br>VLGAVSYL<br>HSLGIVHR(<br>D) | s:Phosphorylated S                                                    | 3193.675 | Q6P2M8 | Calcium/calmodulin-<br>dependent protein<br>kinase type 1B          | S : 114            | NR                                                                                                    |
| 17 | 3 | 6.75 | 93.3 | 1712349 | (R)NLSFDS<br>EEEEELGEL<br>LQQFGELK<br>(Y)            |                                                                       | 2554.22  | Q9NW13 | RNA-binding protein<br>28                                           | NR                 | S : 122, 202                                                                                          |
| 18 | 3 | 6.63 | 62.1 | 6217155 | (K)RLVLTH<br>FSQRYKPV<br>ALAR(E)                     |                                                                       | 2155.261 | Q9H777 | Zinc phosphodiesterase<br>ELAC protein 1                            | NR                 | NR                                                                                                    |
| 19 | 3 | 6.62 | 90.1 | 4703006 | (R)TDERLN<br>WlyYKDQT<br>GNNR(V)                     | y:Phosphorylated Y                                                    | 2286.09  | O15537 | Retinoschisin                                                       | Y : 165            | NR                                                                                                    |
| 20 | 3 | 6.5  | 100  | 2165855 | (K)LsQLKs<br>QQVAAA<br>HEANKLKF<br>(E)               | s:Phosphorylated S                                                    | 2282.262 | Q12830 | Nucleosome-remodeling<br>factor subunit BPTF                        | S : 788,<br>792    | S : 216, 572,<br>763, 817,<br>1231, 1300,<br>1827, 1833,<br>2098, 2465<br>T : 909,<br>1064 Y :<br>839 |

|    |   |      |      |         |                                               |                                                                       |          |        |                                                 |            |                                                                                                                                                       |
|----|---|------|------|---------|-----------------------------------------------|-----------------------------------------------------------------------|----------|--------|-------------------------------------------------|------------|-------------------------------------------------------------------------------------------------------------------------------------------------------|
| 21 | 3 | 6.41 | 81.4 | 1761384 | (K)QTEFIH<br>AEILRELS<br>MECGLNN<br>RIR(M)    | C:Carbamidomethylation<br>t:Phosphorylated<br>T<br>s:Phosphorylated S | 3006.55  | P49815 | Tuberin                                         | S : 41, 49 | S : 939, 981,<br>1097, 1132,<br>1155, 1334,<br>1337, 1338,<br>1341, 1364,<br>1387, 1388,<br>1411, 1418,<br>1420, 1449,<br>1452, 1462,<br>1798 T : 927 |
| 22 | 3 | 6.27 | 91   | 2842742 | (K)LPSSVF<br>AsEFEEDV<br>GLLNKAAP<br>VSGPR(L) | s:Phosphorylated S                                                    | 2816.447 | Q96GA3 | Protein LTV1 homolog                            | S : 116    | S : 182, 188,<br>244, 331                                                                                                                             |
| 23 | 3 | 6.19 | 87.6 | 5197425 | (K)RVEIMA<br>QCEEWIAD<br>IQQYsSDK(<br>R)      | C:Carbamidomethylation<br>s:Phosphorylated S                          | 2699.244 | Q9NR09 | Baculoviral IAP repeat-<br>containing protein 6 | S : 4781   | S : 473, 480                                                                                                                                          |
| 24 | 3 | 6.06 | 64.5 | 2327496 | (R)GGDVAS<br>MYTPNAQ<br>YQMRCtF<br>HPR(C)     | C:Carbamidomethylation<br>t:Phosphorylated T                          | 2847.222 | P03952 | Plasma kallikrein                               | T : 52     | NR                                                                                                                                                    |

**Table S2: Proteins identified in fraction 1 of cells grown together with As(III) and SeMet, fraction isolated based on Size Exclusion Chromatography (SEC).**

| No | Charge | Score | Peptide Intensity | Total Intensity | Sequence                             | Modifications                                  | Matched parent mass | Accession number | Protein name                              | Variable Sites found in the study | UniprotKB Reported Variable Sites |
|----|--------|-------|-------------------|-----------------|--------------------------------------|------------------------------------------------|---------------------|------------------|-------------------------------------------|-----------------------------------|-----------------------------------|
| 1  | 2      | 19.79 | 97.1              | 6288674         | (R)IQEIIQL<br>DVTTSEYEK<br>(E)       |                                                | 2038.02             | P10809           | 60 kDa heat shock protein, mitochondrial  | NR                                | S : 70                            |
| 2  | 2      | 15.54 | 88.7              | 6790895         | (K)ATAGDT<br>HLGGEDFD<br>NR(L)       |                                                | 1675.73             | P34931           | Heat shock 70 kDa protein                 | NR                                | NR                                |
| 3  | 2      | 14.5  | 100               | 1E+07           | (R)VEIAND<br>QGNR(I)                 |                                                | 1228.62             | P11021           | 78 kDa glucose-regulated protein          | NR                                | T : 166, Y : 466, S : 571         |
| 4  | 2      | 11.62 | 79.7              | 1.5E+07         | (K)DCGATW<br>VVLGHSER<br>(R)         | C:Carbamidomethylation                         | 1586.73             | P60174           | Triosephosphate isomerase                 | NR                                | S : 21, 80                        |
| 5  | 2      | 11.5  | 100               | 9763194         | (K)DSYVGD<br>EAQSK(R)                |                                                | 1198.52             | P62736           | Actin, aortic smooth muscle               | NR                                | S : 325                           |
| 6  | 3      | 11.38 | 85.3              | 1.2E+07         | (R)CTEPEDQ<br>LyyVKFLSLP<br>EVR(Q)   | C:Carbamidomethylation<br>y:Phosphorylated Y   | 2486.22             | Q9H3G5           | Probable serine carboxypeptidase CPVL     | Y : 328, 329                      | NR                                |
| 7  | 2      | 10.8  | 80.1              | 9369689         | (K)TAFQEAL<br>DAAGDK(L)              |                                                | 1336.63             | P10599           | Thioredoxin                               | NR                                | T : 100                           |
| 8  | 2      | 9.98  | 81.4              | 2552994         | (K)GHYTEG<br>AELVDSVLD<br>VVR(K)     |                                                | 1958.98             | Q13885           | Tubulin beta-2A chain                     | NR                                | S : 78, 95                        |
| 9  | 3      | 9.84  | 95.4              | 3433608         | (K)AEASSGD<br>HPTDTEMK<br>EEQK(S)    |                                                | 2089.89             | Q02790           | Peptidyl-prolyl cis-trans isomerase FKBP4 | NR                                | T : 143, S : 451, 453             |
| 10 | 3      | 9.84  | 74.2              | 2.2E+07         | (R)ASDTLSA<br>EVRTRVGyV<br>R(Q)      | y:Phosphorylated Y                             | 1879.99             | Q9H254           | Spectrin beta chain                       | Y : 2178                          | T : 2111, 2112 S : 2121           |
| 11 | 3      | 8.58  | 64.7              | 9424084         | MSHLQsLLL<br>DlLLGTKHV<br>DSAALIK(I) | t:Phosphorylated<br>T<br>s:Phosphorylated<br>S | 2704.5              | Q8NHR9           | Profilin-4                                | S : 6, T : 11                     | NR                                |
| 12 | 2      | 8.51  | 83                | 1.8E+07         | (K)GDGPVQ<br>GIINFEQK(E)             |                                                | 1501.76             | P00441           | Superoxide dismutase                      | NR                                | S : 99                            |

|    |   |      |      |         |                                     |                                           |         |        |                                                 |                 |                                                                               |
|----|---|------|------|---------|-------------------------------------|-------------------------------------------|---------|--------|-------------------------------------------------|-----------------|-------------------------------------------------------------------------------|
| 13 | 3 | 8.31 | 90   | 1.4E+07 | (R)DVVCEDEDAFCLsLENIATLQKLLR(Q)     | C:Carbamidomethylation;s:Phosphorylated S | 2951.44 | O43663 | Protein regulator of cytokinesis                | S : 211         | S : 195, 265, 501, 513, 571, 592, 615 T : 470, 481, 616                       |
| 14 | 3 | 8    | 100  | 2270809 | (K)AGAAPYVQAFDSLLAGPVAEYLK(I)       |                                           | 2351.22 | Q01518 | Adenylyl cyclase-associated protein             | NR              | S : 290, 295, 301, 308, 310 T : 164, 307                                      |
| 15 | 2 | 7.91 | 84.1 | 6794591 | (R)SVGDGETVEFDVVEGEK(G)             |                                           | 1795.82 | P16989 | DNA-binding protein A                           | NR              | S : 2, 34, 38, 79, 134, 201, 203, 287, 369, 370 T : 287                       |
| 16 | 3 | 7.8  | 75.7 | 8236621 | (K)MAKSFTSEDDLVLQILNLGAK(L)         |                                           | 2421.3  | O00203 | AP-3 complex subunit beta-1                     | NR              | S : 276, 609, 661                                                             |
| 17 | 2 | 7.69 | 91.8 | 3069351 | (R)HPEIKVTAK(Y)                     |                                           | 1022.59 | Q96JM2 | Zinc finger protein 462                         | NR              | S : 1076, 1079, 1082, 2024 Y : 2083                                           |
| 18 | 2 | 7.52 | 83.3 | 6119478 | (R)DADDAVYELNGK(D)                  |                                           | 1309.59 | Q08170 | Serine/arginine-rich splicing factor 4          | NR              | S : 113, 222, 255, 300, 302, 304, 316, 322, 448, 458, 460, 462 Y : 53 T : 440 |
| 19 | 3 | 7.45 | 72.5 | 2476994 | (R)DLLPSGSRDEPPASQSTSQDCsQALKQSP(-) | C:Carbamidomethylation;s:Phosphorylated S | 3183.48 | Q5JRA6 | Melanoma inhibitory activity protein 3          | S : 1900        | S : 727, 1727, 1739, 1740, 1892, 1906 T : 382                                 |
| 20 | 3 | 7.4  | 68.2 | 2319204 | (R)SLDAQSVyVATDSESYVPELQQLFK(G)     | y:Phosphorylated Y                        | 2817.38 | Q9H488 | GDP-fucose protein O-fucosyltransferase 1       | Y : 307         | NR                                                                            |
| 21 | 2 | 7.1  | 83.8 | 5427945 | (R)DPENFPFVVLGNK(I)                 |                                           | 1475.75 | P51149 | Ras-related protein Rab-7a                      | NR              | S : 72 Y : 183                                                                |
| 22 | 2 | 7.05 | 69.1 | 1.3E+09 | (K)SSNVLLDQNLtPK(L)                 | t:Phosphorylated T                        | 1428.76 | O43187 | Interleukin-1 receptor-associated kinase-like 2 | T : 348         | T : 368                                                                       |
| 23 | 2 | 7    | 67.3 | 6831116 | (K)EKtIsVSSKSGPVIAK(R)              | t:Phosphorylated T<br>s:Phosphorylated S  | 1717.96 | Q8N3X1 | Formin-binding protein 4                        | S : 285 T : 283 | S : 18, 116, 172, 432, 435, 442, 499, 508, 963, 964, 965 T : 516, 517 Y : 113 |



|    |   |      |      |         |                                              |                                                                          |         |        |                                                                |                      |                                               |
|----|---|------|------|---------|----------------------------------------------|--------------------------------------------------------------------------|---------|--------|----------------------------------------------------------------|----------------------|-----------------------------------------------|
| 24 | 3 | 6.92 | 85   | 4142276 | (K)FTEWAY<br>GPVHSSLYD<br>LsCIDtCEK(N)       | C:Carbamidomethylation<br>t:Phosphorylated<br>T<br>s:Phosphorylated<br>S | 2878.27 | Q8NER1 | Transient receptor potential cation channel subfamily V member | S : 386 T : 390      | S : 117, 502, 775, 801, 821 T : 145, 371, 705 |
| 25 | 3 | 6.75 | 77.6 | 6825687 | (K)STPSAPW<br>ITEMMNsvS<br>EDtIK(E)          | t:Phosphorylated<br>T<br>s:Phosphorylated<br>S                           | 2324.07 | Q8WXI7 | Mucin-16                                                       |                      | NR                                            |
| 26 | 3 | 6.73 | 84.7 | 7615616 | (K)SEFPVRT<br>LKtLLHtLC<br>K(L)              | C:Carbamidomethylation<br>t:Phosphorylated T                             | 2057.15 | Q14008 | Cytoskeleton-associated protein                                | T : 1762, 1766       | S : 816                                       |
| 27 | 2 | 6.73 | 93.6 | 9457260 | (K)KVEEAEP<br>EEFVVEK(V)                     |                                                                          | 1661.82 | Q13185 | Chromobox protein homolog                                      | NR                   | S : 93, 95, 97, 99, 176                       |
| 28 | 2 | 6.72 | 75.2 | 1.1E+07 | (R)yATALYs<br>AASKQNK(L)                     | y:Phosphorylated<br>Y<br>s:Phosphorylated<br>S                           | 1515.78 | P48047 | ATP synthase subunit O, mitochondrial                          | S : 47 Y : 41        | NR                                            |
| 29 | 3 | 6.67 | 67.4 | 3E+07   | (K)LNTPSSL<br>AVCADGEL<br>YVADLGNIR<br>IR(F) | C:Carbamidomethylation                                                   | 2817.45 | Q6N022 | Teneurin-4                                                     | NR                   | NR                                            |
| 30 | 3 | 6.6  | 88   | 7855747 | (MGKAENyE<br>LYSVELGPG<br>PGGDMAAK<br>(M)    | y:Phosphorylated Y                                                       | 2584.2  | P20648 | Potassium-transporting ATPase alpha chain                      | Y : 7                | S : 954                                       |
| 31 | 2 | 6.5  | 100  | 4018747 | (K)EKsEFVD<br>DITtR(R)                       | t:Phosphorylated<br>T<br>s:Phosphorylated<br>S                           | 1439.7  | Q9Y6V0 | Protein piccolo                                                | S : 1428<br>T : 1436 | S : 2895                                      |
| 32 | 2 | 6.45 | 97.4 | 2492273 | (K)HGDPGD<br>AAQQEAK(H)                      |                                                                          | 1323.59 | O14737 | Programmed cell death protein                                  | NR                   | S : 119                                       |
| 33 | 2 | 6.23 | 73.8 | 3691102 | (K)TENNDHI<br>NLK(V)                         |                                                                          | 1197.58 | P61956 | Small ubiquitin-related modifier                               | NR                   | NR                                            |
| 34 | 3 | 6.22 | 73   | 1.2E+07 | (R)CQGsGDD<br>NLTSLGtLN<br>FPGR(T)           | C:Carbamidomethylation<br>t:Phosphorylated<br>T<br>s:Phosphorylated<br>S | 2108.96 | P04150 | Glucocorticoid receptor                                        | S : 370 T : 380      | S : 45, 134, 203, 211, 226, 234, 267 T : 8    |
| 35 | 3 | 6.22 | 74.4 | 2327828 | (K)LFFHTEY<br>EKtNPGMKP<br>YGYKECGK(G)       | C:Carbamidomethylation<br>t:Phosphorylated<br>T<br>y:Phosphorylated<br>Y | 2924.37 | P17025 | Zinc finger protein 182                                        | T : 199 Y : 208      | NR                                            |
| 36 | 3 | 6.21 | 73   | 1.8E+07 | (K)TTAPFKI<br>PKtQASnLL<br>ALVTR(H)          | t:Phosphorylated<br>T<br>s:Phosphorylated<br>S                           | 2357.35 | Q8IYT8 | Serine/threonine-protein kinase ULK2                           | S : 617 T : 613      | NR                                            |

|    |   |      |      |         |                                       |                                                |         |        |                                                  |                    |                                                                                |
|----|---|------|------|---------|---------------------------------------|------------------------------------------------|---------|--------|--------------------------------------------------|--------------------|--------------------------------------------------------------------------------|
| 37 | 3 | 6.13 | 93.7 | 9979191 | (K)AVGSLDP<br>SADLSSQRG<br>KVEK(L)    | s:Phosphorylated S                             | 2062.09 | O14522 | Receptor-type<br>tyrosine-protein<br>phosphatase | S : 529            | NR                                                                             |
| 38 | 3 | 6.09 | 89.9 | 3329637 | (R)DMQPLSP<br>ISVHERysSP<br>TAGSAK(R) | y:Phosphorylated<br>Y<br>s:Phosphorylated<br>S | 2458.2  | P28749 | Retinoblastoma-like<br>protein                   | S : 649 Y<br>: 648 | S : 640, 650, 749,<br>762, 964, 975,<br>988, 1009 T :<br>332, 369, 385,<br>997 |

**Table S3: Proteins identified in fraction 2 of cells grown together with As(III) and SeMet, fraction isolated based on Size Exclusion Chromatography (SEC).**

| No | Charge | Score | Peptide Intensity | Total Intensity | Sequence                     | Modifications                                                      | Matched parent mass | Accession number | Entry name                              | Variable Sites found in the study | UniprotKB Reported Variable Sites                                                                                           |
|----|--------|-------|-------------------|-----------------|------------------------------|--------------------------------------------------------------------|---------------------|------------------|-----------------------------------------|-----------------------------------|-----------------------------------------------------------------------------------------------------------------------------|
| 1  | 2      | 11.29 | 95.1              | 8.79E+06        | (K)DVNFEF PEFQL(-)           |                                                                    | 1384.642            | P62081           | 40S ribosomal protein S7                | NR                                | NR                                                                                                                          |
| 2  | 3      | 10.25 | 67.7              | 1.29E+08        | (R)QSQPPSI sFNKtINSR(I)      | t:Phosphorylated T<br>s:Phosphorylated S                           | 1803.935            | P82987           | ADAMTS-like protein 3                   | S : 1189<br>T : 1193              | NR                                                                                                                          |
| 3  | 3      | 8.21  | 67.6              | 1.84E+08        | (R)yANLGN VLILRSVST AVYKR(F) | y:Phosphorylated Y                                                 | 2237.276            | O76090           | Bestrophin-1                            | Y : 131                           | NR                                                                                                                          |
| 4  | 3      | 7.85  | 68.5              | 4.58E+08        | (K)WQVSR EDQDKVA VLsQNR(T)   | s:Phosphorylated S                                                 | 2158.1              | Q9BWD1           | Acetyl-CoA acetyltransferase, cytosolic | S : 185                           | NR                                                                                                                          |
| 5  | 3      | 7.21  | 84.6              | 5.67E+07        | (R)HMSVAL SWAVtSRQ DPTSQK(V) | t:Phosphorylated T                                                 | 2229.108            | P55345           | Protein arginine N-methyltransferase 2  | T : 414                           | NR                                                                                                                          |
| 6  | 3      | 7.15  | 75.2              | 1.38E+08        | (K)RsSSMA DGDNSyCL EAIIR(Q)  | C:Carbamidomethylation<br>y:Phosphorylated Y<br>s:Phosphorylated S | 2144.97             | Q9ULV0           | Myosin-Vb                               | S : 1642<br>Y : 1652              | S : 1446 Y : 694                                                                                                            |
| 7  | 3      | 7.09  | 64.8              | 2.06E+07        | (R)WVDPNS PVLLEDPV LCALAK(K) | C:Carbamidomethylation                                             | 2236.168            | P42330           | Aldo-keto reductase family 1 member C3  | NR                                | NR                                                                                                                          |
| 8  | 3      | 6.96  | 66.4              | 4.46E+07        | (R)LTCEEE EEKMFGR GSR(H)     | C:Carbamidomethylation                                             | 1957.874            | P51532           | Transcription activator BRG1            | NR                                | S : 609, 610, 613, 655, 657, 660, 662, 695, 699, 721, 1382, 1452, 1570, 1575, 1586, 1627, 1631, 1640, 1642, 1644 T: 11, 609 |

|    |   |      |      |          |                               |                                                                    |          |        |                                                        |                  |                                                                                                                                                                                    |
|----|---|------|------|----------|-------------------------------|--------------------------------------------------------------------|----------|--------|--------------------------------------------------------|------------------|------------------------------------------------------------------------------------------------------------------------------------------------------------------------------------|
| 9  | 3 | 6.82 | 60.8 | 1.64E+07 | (K)SsPGtQDLLGIQTGM MAPENK(V)  | t:Phosphorylated T<br>s:Phosphorylated S                           | 2175.042 | Q5SW79 | Centrosomal protein of 170 kDa                         | S : 313 T : 316  | T : 377, 501, 628, 937, 1533 S : 168, 354, 356, 359, 446, 502, 580, 630, 633, 636, 667, 838, 879, 930, 958, 1079, 1112, 1160, 1165, 1198, 1251, 1260, 1270, 1521, 1522, 1529, 1533 |
| 10 | 3 | 6.72 | 85.9 | 9.33E+07 | (R)CGPRAN GEEASSCA WVSRAPR(A) | C:Carbamidomethylation                                             | 2318.051 | Q96N53 | Putative uncharacterized protein encoded by NCRNA00167 | NR               | NR                                                                                                                                                                                 |
| 11 | 3 | 6.64 | 67.5 | 1.27E+08 | (R)STESVK STVSETYLs KPSIAK(R) | s:Phosphorylated S                                                 | 2242.181 | Q7Z6B7 | SLIT-ROBO Rho GTPase-activating protein 1              | S : 421          | S : 906, 917, 999, 1005, 1008, 1010, 1029, 1032 T : 1001, 1004                                                                                                                     |
| 12 | 3 | 6.63 | 78.8 | 9.63E+06 | (R)GGVSEG QMK(Q)              |                                                                    | 892.419  | Q9HCK5 | Protein argonaute-4                                    | NR               | S : 798                                                                                                                                                                            |
| 13 | 3 | 6.62 | 71.6 | 6.97E+06 | (K)ETITKM LWSrLLN ITK(E)      | t:Phosphorylated T                                                 | 2149.205 | Q5XG92 | Carboxylesterase 4A                                    | T : 383, 385     | NR                                                                                                                                                                                 |
| 14 | 3 | 6.59 | 65.9 | 1.83E+08 | (K)AKPMC NtCGKVFS EASsLRR(H)  | C:Carbamidomethylation<br>t:Phosphorylated T<br>s:Phosphorylated S | 2299.11  | Q9NPC7 | Myoneurin                                              | T : 306, S : 316 | S : 289                                                                                                                                                                            |
| 15 | 3 | 6.58 | 67.9 | 1.67E+08 | (R)DIHsGDF RDREGPPM DYR(G)    | s:Phosphorylated S                                                 | 2162.967 | P78332 | RNA-binding protein 6                                  | S : 122          | S : 360, 362, 891, 1022, 1025 T : 923 Y : 914                                                                                                                                      |
| 16 | 2 | 6.58 | 87.4 | 2.59E+06 | (R)IGDQEF DSLPALLE FYK(I)     |                                                                    | 1984.99  | P46108 | Adapter molecule crk                                   | NR               | S : 41, 74 T : 42 Y : 136, 221, 239, 251                                                                                                                                           |
| 17 | 3 | 6.55 | 62.3 | 1.20E+08 | (K)LRNRSS FSrNVVYTT PGtR(V)   | t:Phosphorylated T                                                 | 2156.121 | Q08828 | Adenylate cyclase type 1                               | T : 554, 563     | NR                                                                                                                                                                                 |

|    |   |      |      |          |                                          |                                              |          |        |                                                           |                      |                                                                                                                                                                                                     |
|----|---|------|------|----------|------------------------------------------|----------------------------------------------|----------|--------|-----------------------------------------------------------|----------------------|-----------------------------------------------------------------------------------------------------------------------------------------------------------------------------------------------------|
| 18 | 3 | 6.43 | 60.2 | 1.29E+08 | (R)GPPEGG<br>LNEDERLL<br>PKDK(K)         |                                              | 1964.008 | P00519 | Tyrosine-protein<br>kinase ABL1                           | NR                   | S : 50, 446, 569, 618,<br>619, 620, 659, 683,<br>718, 805, 809, 855,<br>917, 919, 936, 949,<br>977 T : 392, 394, 613,<br>735, 781, 814, 844,<br>852 Y : 70, 185, 226,<br>253, 257, 264, 393,<br>469 |
| 19 | 3 | 6.24 | 73.2 | 1.69E+08 | (R)AQNCNI<br>LLsRLKLS<br>NDEIK(R)        | C:Carbamidomethylation<br>s:Phosphorylated S | 2229.202 | Q9Y4D1 | Disheveled-<br>associated activator<br>of morphogenesis 1 | S : 701              | NR                                                                                                                                                                                                  |
| 20 | 3 | 6.2  | 73.7 | 1.56E+07 | (K)VLySQG<br>VKLFRFDA<br>EVsQWK(E)       | y:Phosphorylated<br>Y<br>s:Phosphorylated S  | 2400.271 | A6NKT7 | RanBP2-like and<br>GRIP domain-<br>containing protein 3   | S : 1075<br>Y : 1061 | NR                                                                                                                                                                                                  |
| 21 | 3 | 6.05 | 72.5 | 1.24E+08 | (K)ELHVYVY<br>ALsHVCQG<br>DR(T)          | C:Carbamidomethylation<br>s:Phosphorylated S | 1882.923 | P20936 | Ras GTPase-<br>activating protein 1                       | S : 742              | Y : 615                                                                                                                                                                                             |
| 22 | 3 | 6.05 | 77.2 | 7.75E+07 | (K)WDSEsN<br>SERDVTKN<br>SK(N)           | s:Phosphorylated S                           | 1881.857 | P30414 | NK-tumor<br>recognition protein                           | S : 889              | S: 347, 379, 406, 408,<br>410, 463, 572, 887,<br>889, 891, 1146 T : 343                                                                                                                             |
| 23 | 3 | 6.04 | 70.4 | 1.84E+07 | (K)HGLSYE<br>VKPFLTAL<br>VDIVRsLK(<br>K) | s:Phosphorylated S                           | 2485.418 | Q9Y5Q0 | Fatty acid<br>desaturase 3                                | S : 430              | NR                                                                                                                                                                                                  |
| 24 | 3 | 6.03 | 61.2 | 2.74E+08 | (R)SSGLSSR<br>ENSALTLT<br>DSDNENK(S<br>) |                                              | 2325.08  | Q9NT68 | Teneurin-2                                                | NR                   | S : 523 Y : 1150                                                                                                                                                                                    |

**Table S4: Proteins identified in fraction 3 of cells grown together with As(III) and SeMet, fraction isolated based on Size Exclusion Chromatography (SEC).**

| No | Charge | Score | Peptide Intensity | Total Intensity | Sequence                              | Modifications                                                         | Matched parent mass | Accession number | Entry name                                                                     | Variable Sites found in the study | UniprotKB Reported Variable Sites                                                                                                                                                                  |
|----|--------|-------|-------------------|-----------------|---------------------------------------|-----------------------------------------------------------------------|---------------------|------------------|--------------------------------------------------------------------------------|-----------------------------------|----------------------------------------------------------------------------------------------------------------------------------------------------------------------------------------------------|
| 1  | 3      | 8.61  | 63.2              | 1.07E+07        | (R)GVKSSPIQ<br>TPNQTPQQA<br>PVTPRK(E) |                                                                       | 2459.336            | Q8IZS6           | Tctex1 domain-containing protein 3                                             | NR                                | NR                                                                                                                                                                                                 |
| 2  | 3      | 8.47  | 69.2              | 1.76E+07        | (K)tFLQREHQ<br>PFSLQCEAVY<br>K(A)     | C:Carbamidomethylation<br>t:Phosphorylated T                          | 2381.171            | P08648           | Integrin alpha-5                                                               | T : 944                           | NR                                                                                                                                                                                                 |
| 3  | 3      | 8.42  | 63.4              | 2.68E+06        | (R)QFGALLQ<br>PGVNFSLR<br>MFGSQK(A)   |                                                                       | 2453.312            | Q9UL51           | Potassium/sodium hyperpolarization-activated cyclic nucleotide-gated channel 2 | NR                                | S : 146, 779                                                                                                                                                                                       |
| 4  | 3      | 8.22  | 63.6              | 2.47E+07        | (K)stLKIPAD<br>KHLLQQLEM<br>CVR(K)    | C:Carbamidomethylation<br>t:Phosphorylated<br>T<br>s:Phosphorylated S | 2380.284            | Q6NUP7           | Serine/threonine-protein phosphatase 4 regulatory subunit 4                    | S : 634 T : 635                   | NR                                                                                                                                                                                                 |
| 5  | 3      | 8.04  | 66                | 1.34E+07        | (K)FLYTVPN<br>GNNPTGNSL<br>TSEK(K)    |                                                                       | 2309.152            | Q8N5Z0           | Kynurenine/alpha-aminoadipate aminotransferase, mitochondrial                  | NR                                | NR                                                                                                                                                                                                 |
| 6  | 3      | 8.01  | 62.6              | 4.21E+06        | (R)GPSLLQTP<br>PRVPGQAL<br>SRGDK(G)   |                                                                       | 2302.263            | Q9UFV1           | Putative TBC1 domain family member 29                                          | NR                                | NR                                                                                                                                                                                                 |
| 7  | 3      | 7.73  | 69.8              | 8.87E+06        | (R)FGLQGSA<br>VASsFGNMM<br>SKEKR(D)   | s:Phosphorylated S                                                    | 2232.09             | Q8TE04           | Pantothenate kinase 1                                                          | S: 496                            | NR                                                                                                                                                                                                 |
| 8  | 3      | 7.72  | 62.9              | 4.18E+07        | (K)QNESRTT<br>ECKQNEstIV<br>EPK(Q)    | C:Carbamidomethylation<br>t:Phosphorylated<br>T<br>s:Phosphorylated S | 2378.125            | Q6KC79           | Nipped-B-like protein                                                          | S : 666 T : 667                   | S : 139, 150, 162, 274, 280, 284, 306, 318, 350, 353, 553, 849, 850, 912, 1089, 1090, 1096, 1150, 1152, 1154, 1160, 1459, 2509, 2511, 2513, 2658, 2672 T : 558, 646, 746, 914, 1458, 2667 Y : 1159 |
| 9  | 3      | 7.52  | 74.4              | 3.00E+06        | (K)LSEETKV<br>ALTKLHNsLN<br>EK(S)     | s:Phosphorylated S                                                    | 2154.177            | O94874           | E3 UFM1-protein ligase 1                                                       | S : 629                           | S : 458                                                                                                                                                                                            |

|    |   |      |      |          |                                                 |                                                                       |          |        |                                                                      |                    |                                                                                                                |
|----|---|------|------|----------|-------------------------------------------------|-----------------------------------------------------------------------|----------|--------|----------------------------------------------------------------------|--------------------|----------------------------------------------------------------------------------------------------------------|
| 10 | 3 | 7.26 | 63.4 | 9.31E+06 | (R)VFE <sup>g</sup> PYK<br>EYHEEAQKW<br>DR(Y)   |                                                                       | 2311.078 | Q9C0C4 | Semaphorin-4C                                                        | NR                 | S : 832                                                                                                        |
| 11 | 3 | 7.05 | 69.6 | 4.59E+06 | (K)yLGCKQD<br>NsSSPKSSVF<br>R(N)                | C:Carbamidomethylation<br>y:Phosphorylated<br>Y<br>s:Phosphorylated S | 2157.039 | Q7Z4V0 | Zinc finger<br>protein 438                                           | Y : 478 S<br>: 486 | NR                                                                                                             |
| 12 | 3 | 6.94 | 61.3 | 1.49E+07 | (R)RIVFTITiG<br>AGSAKQSPSS<br>K(H)              | t:Phosphorylated T                                                    | 2036.113 | Q8TEK3 | Histone-lysine N-<br>methyltransferase<br>, H3 lysine-79<br>specific | T : 1051           | S : 297, 374, 471,<br>596, 775, 882, 826,<br>834, 899, 902,<br>1001, 1009, 1104,<br>1246, 1349 T :<br>480, 900 |
| 13 | 3 | 6.9  | 60.9 | 3.27E+06 | (K)ELHVVYA<br>LsHVCQDR(<br>T)                   | C:Carbamidomethylation<br>s:Phosphorylated S                          | 1882.923 | P20936 | Ras GTPase-<br>activating<br>protein1                                | S : 742            | Y : 615                                                                                                        |
| 14 | 3 | 6.82 | 62   | 4.38E+06 | (R)SENGSGsT<br>MMQitKTFSSS<br>SSSKK(M)          | t:Phosphorylated<br>T<br>s:Phosphorylated S                           | 2384.07  | P53814 | Smoothelin<br>OS=Homo<br>sapiens                                     | S : 701 T:<br>706  | S : 245, 301, 304,<br>341, 357, 503, 514,<br>576, 729 T : 351,<br>360                                          |
| 15 | 3 | 6.61 | 65.3 | 3.93E+07 | (R)SVLDLVN<br>YFLSPEKLT<br>ENR(Y)               |                                                                       | 2308.218 | Q9P2H5 | Ubiquitin<br>carboxyl-terminal<br>hydrolase 35                       | NR                 | S : 613                                                                                                        |
| 16 | 3 | 6.51 | 81.1 | 1.86E+06 | (K)MEGTGK<br>KAVAGQQQA<br>sVTAGK(V)             | s:Phosphorylated S                                                    | 2047.06  | Q15025 | TNFAIP3-<br>interacting<br>protein 1                                 | S : 284            | S : 99, 403 T : 438                                                                                            |
| 17 | 3 | 6.38 | 62.1 | 5.02E+06 | (R)DTNMIPGs<br>PGSTELEGGF<br>SRQRK(R)           | s:Phosphorylated S                                                    | 2464.189 | Q12809 | Potassium<br>voltage-gated<br>channel<br>subfamily H<br>member 2     | S : 871            | S : 320                                                                                                        |
| 18 | 3 | 6.38 | 61   | 1.44E+07 | (R)NPAVLSA<br>ASFDGRISVY<br>SIMGGSitDGL<br>R(Q) | t:Phosphorylated T                                                    | 2841.42  | O94979 | Protein transport<br>protein Sec31A                                  | T : 338            | S : 527, 532, 799,<br>1163 T : 1161                                                                            |
| 19 | 3 | 6.28 | 62.3 | 5.48E+06 | (R)LMHKLSV<br>EAPPKILVER<br>(Y)                 |                                                                       | 1960.141 | P53990 | IST1 homolog<br>OS=Homo<br>sapiens                                   | NR                 | Y : 43                                                                                                         |
| 20 | 3 | 6.19 | 73.7 | 5.09E+06 | (R)TREEWTS<br>AQVPRGGEs<br>QK(D)                | s:Phosphorylated S                                                    | 2046     | Q6PRD1 | Probable G-<br>protein coupled<br>receptor 179                       | S : 1616           | NR                                                                                                             |
| 21 | 3 | 6.11 | 60.4 | 4.64E+06 | (R)DPLMIFVL<br>NEKVDEFSG<br>VLR(V)              |                                                                       | 2321.221 | Q9NZJ4 | Saccin                                                               | NR                 | S : 338, 4264 T :<br>4263 Y : 4333                                                                             |

**Table S5: Proteins identified in fraction 4 of cells grown together with As(III) and SeMet, fraction isolated based on Size Exclusion Chromatography (SEC).**

| No | Charge | Score | Peptide Intensity | Total Intensity | Sequence                              | Modifications          | Matched parent mass | Accession number | Entry name                                        |
|----|--------|-------|-------------------|-----------------|---------------------------------------|------------------------|---------------------|------------------|---------------------------------------------------|
| 1  | 3      | 18.76 | 90.2              | 6.61E+07        | (K)LAYVAAGDLAPINAFI<br>GGLAAQEVMK(A)  |                        | 2603.39             | P22314           | Ubiquitin-like modifier-activating enzyme 1       |
| 2  | 2      | 18.39 | 97                | 1.47E+07        | (R)LGFSEVELVQMVDVG<br>VK(L)           |                        | 1848.978            | P12277           | Creatine kinase B-type OS=Homo sapiens            |
| 3  | 3      | 16.45 | 88.6              | 7.81E+06        | (R)NDFQLIGIQDGYLSLL<br>QDSGEVR(E)     |                        | 2580.294            | P63241           | Eukaryotic translation initiation factor 5A-1     |
| 4  | 3      | 15.21 | 84.1              | 4.67E+07        | (R)YVEPIEDVPCGNIVGLV<br>GVDQFLVK(T)   | C:Carbamidomethylation | 2759.432            | P13639           | Elongation factor 2 OS=Homo sapiens               |
| 5  | 3      | 13.47 | 88                | 2.80E+07        | (K)DGPLNMILDDGGDLTN<br>LIHTK(Y)       |                        | 2252.123            | P23526           | Adenosylhomocysteinase                            |
| 6  | 2      | 13.42 | 80.7              | 2.63E+07        | (K)QIVWNGPVGVFWEWA<br>FAR(G)          |                        | 2105.06             | P00558           | Phosphoglycerate kinase 1                         |
| 7  | 2      | 11.83 | 93.5              | 6.01E+06        | (R)DLFEDELVPLFEK(A)                   |                        | 1593.805            | O60506           | Heterogeneous nuclear ribonucleoprotein Q         |
| 8  | 3      | 11.15 | 93.3              | 8.43E+06        | (R)CLQILAAGLFLPGSVGI<br>TDPCESGNFR(V) | C:Carbamidomethylation | 2892.438            | Q12905           | Interleukin enhancer-binding factor 2             |
| 9  | 3      | 10.83 | 86.3              | 1.08E+07        | (K)ISFPAIQAAPSFSNSFPQ<br>IFR(D)       |                        | 2325.203            | P23381           | Tryptophanyl-tRNA synthetase, cytoplasmic         |
| 10 | 2      | 10.32 | 83.5              | 2.39E+06        | (K)ALINADELASDVAGAE<br>ALLDR(H)       |                        | 2127.093            | Q13813           | Spectrin alpha chain                              |
| 11 | 3      | 9.77  | 65.9              | 8.47E+06        | (R)AVSTGVQAGIPMPCFT<br>TALSFYDGYR(H)  | C:Carbamidomethylation | 2809.332            | P52209           | 6-phosphogluconate dehydrogenase, decarboxylating |
| 12 | 3      | 9.55  | 79.8              | 8.77E+06        | (K)ASLVKNGAEFTDSLISN<br>LLR(L)        |                        | 2148.166            | Q14562           | ATP-dependent RNA helicase DHX8                   |
| 13 | 2      | 9.2   | 90.3              | 4.77E+06        | (K)LIHVSNPVDILTIVAWK<br>(L)           |                        | 1944.121            | Q9BYZ2           | L-lactate dehydrogenase A-like 6B                 |
| 14 | 2      | 9     | 100               | 2.02E+06        | (R)DQEGQDVLFFIDNIFR(<br>F)            |                        | 1921.965            | P06576           | ATP synthase subunit beta, mitochondrial          |
| 15 | 3      | 8.83  | 94.6              | 4.11E+06        | (K)VMIPQDEYPEINFVGL<br>LIGPR(G)       |                        | 2400.263            | Q15637           | Splicing factor 1                                 |
| 16 | 3      | 8.8   | 92.4              | 7.73E+06        | (R)YSLLPFWYTLTYQAHR<br>(E)            |                        | 2071.08             | Q14697           | Neutral alpha-glucosidase AB                      |



|    |   |      |      |          |                                         |                                                                       |          |        |                                                           |
|----|---|------|------|----------|-----------------------------------------|-----------------------------------------------------------------------|----------|--------|-----------------------------------------------------------|
| 17 | 3 | 8.64 | 89.4 | 5.42E+06 | (R)NDFQLIGIQDGYLSLL<br>QDSGEVR(E)       |                                                                       | 2580.294 | P63241 | Eukaryotic translation initiation factor 5A-1             |
| 18 | 2 | 8.5  | 100  | 3.61E+06 | (K)FTASAGIQVVGDDLT<br>TNPK(R)           |                                                                       | 2033.055 | P06733 | Alpha-enolase                                             |
| 19 | 2 | 8.5  | 100  | 2.10E+06 | (R)DQEGQDVLLFIDNIFR<br>(F)              |                                                                       | 1921.965 | P06576 | ATP synthase subunit beta, mitochondrial                  |
| 20 | 3 | 7.97 | 66.3 | 7.27E+06 | (K)LISVFyAIVMPLLNPViy<br>SLR(N)         | y:Phosphorylated Y                                                    | 2421.398 | O95006 | Olfactory receptor 2F2                                    |
| 21 | 3 | 7.91 | 84.6 | 4.55E+06 | (R)ASTAAAPLAAWVKANI<br>QYSHVLER(I)      |                                                                       | 2567.373 | Q8NCM8 | Cytoplasmic dynein 2 heavy chain 1                        |
| 22 | 3 | 7.85 | 62.8 | 1.09E+07 | (K)RTEDDPEVGGPCyTLY<br>LEYLGGVLPIK(G)   | C:Carbamidomethylation<br>y:Phosphorylated Y                          | 3167.597 | Q9NRJ4 | Tubby-related protein 4                                   |
| 23 | 3 | 7.74 | 92.2 | 1.30E+07 | (R)sGHVKAFAHITGGGLL<br>ENIPR(V)         | s:Phosphorylated S                                                    | 2174.183 | P22102 | Trifunctional purine biosynthetic protein<br>adenosine-3  |
| 24 | 3 | 7.54 | 66.7 | 7.02E+06 | (R)GITQALNLVDsLSLKLE<br>TDTLLSAMLK(S)   | s:Phosphorylated S                                                    | 2887.606 | P86452 | Zinc finger BED domain-containing protein 6               |
| 25 | 2 | 7.5  | 100  | 7.23E+06 | (K)DLVSSLTSGLLTIGDR<br>(F)              |                                                                       | 1646.896 | P53396 | ATP-citrate synthase                                      |
| 26 | 3 | 7.41 | 85.2 | 6.66E+06 | (R)AFADAMEVIPSTLAEN<br>AGLNPISTVTELR(N) |                                                                       | 3030.545 | P50991 | T-complex protein 1 subunit delta                         |
| 27 | 3 | 7.3  | 67.4 | 9.19E+06 | (R)ALESRLQDWQAYQHR<br>LSETR(T)          |                                                                       | 2487.249 | Q8NF91 | Nesprin-1 OS=Homo sapiens                                 |
| 28 | 3 | 7.16 | 64.9 | 1.83E+07 | (K)HHFGINKPEKIIPsPDDs<br>K(F)           | s:Phosphorylated S                                                    | 2159.124 | Q9Y2H2 | Phosphatidylinositide phosphatase SAC2                    |
| 29 | 3 | 7.12 | 82.9 | 6.52E+06 | (K)HHEELNLRSLTyERLE<br>ADK(K)           | t:Phosphorylated<br>T<br>y:Phosphorylated Y                           | 2422.246 | Q15906 | Vacuolar protein sorting-associated protein 72<br>homolog |
| 30 | 3 | 7.12 | 75.6 | 1.41E+07 | (R)ASSSGNQESSGQSCIL<br>LFDVIKSAIR(Y)    | C:Carbamidomethylation                                                | 2867.457 | Q9BXW9 | Fanconi anemia group D2 protein                           |
| 31 | 3 | 6.85 | 80   | 6.42E+06 | (R)RWGDSVLLVDLTHEE<br>MPQSIVEATSR(L)    |                                                                       | 2968.483 | Q9BYD3 | 39S ribosomal protein L4, mitochondrial                   |
| 32 | 3 | 6.69 | 73.5 | 1.23E+07 | (K)EEMLFALVTRKTVtV<br>GEK(L)            | t:Phosphorylated T                                                    | 2180.163 | B2RTY4 | Myosin-IXa                                                |
| 33 | 2 | 6.5  | 100  | 3.43E+06 | (K)AAFDDAIAELDTLSEES<br>YK(D)           |                                                                       | 2087.965 | P62258 | 14-3-3 protein epsilon                                    |
| 34 | 3 | 6.5  | 100  | 4.70E+06 | (R)AWNDVDALFtTKNWL<br>GyTKK(R)          | t:Phosphorylated<br>T<br>y:Phosphorylated Y                           | 2371.208 | Q9H9C1 | VPS33B-interacting protein                                |
| 35 | 3 | 6.5  | 100  | 5.30E+06 | (K)HKPQAPVIVKTEEVIN<br>MHTFNDR(R)       |                                                                       | 2703.403 | Q13002 | Glutamate receptor, ionotropic kainate 2                  |
| 36 | 3 | 6.41 | 81.6 | 1.98E+07 | (K)LSSCIAAIAALSAKKAAs<br>DSCK(E)        | C:Carbamidomethylation<br>s:Phosphorylated S                          | 2223.147 | Q9HCE3 | Zinc finger protein 532                                   |
| 37 | 3 | 6.32 | 82.2 | 3.83E+06 | (K)ESKSCtIGMVLRLWsDT<br>K(I)            | C:Carbamidomethylation<br>t:Phosphorylated<br>T<br>s:Phosphorylated S | 2111.062 | Q8WYL5 | Protein phosphatase Slingshot homolog 1                   |

|    |   |      |      |          |                                       |                                              |          |        |                                                           |
|----|---|------|------|----------|---------------------------------------|----------------------------------------------|----------|--------|-----------------------------------------------------------|
| 38 | 3 | 6.32 | 73.4 | 3.53E+06 | (R)CLLAyFLDKGADELPHY<br>LRCPLHTIFK(L) | C:Carbamidomethylation<br>y:Phosphorylated Y | 3153.626 | O60825 | 6-phosphofructo-2-kinase/fructose-2,6-<br>biphosphatase 2 |
| 39 | 3 | 6.3  | 94.3 | 4.75E+06 | (R)YNEDLELEDAIHTAILT<br>LK(E)         |                                              | 2201.134 | P25787 | Proteasome subunit alpha type-2                           |
| 40 | 3 | 6.16 | 77.4 | 6.91E+06 | (K)LyPGESIGQTSDISSPEL<br>MGVGSLLKK(Y) | y:Phosphorylated Y                           | 2806.454 | O95714 | E3 ubiquitin-protein ligase HERC2                         |
| 41 | 3 | 6.12 | 92.4 | 7.59E+06 | (K)QFLEALLRNSAAPSKD<br>DADHFsR(S)     | s:Phosphorylated S                           | 2725.344 | Q8NAP8 | Zinc finger and BTB domain-containing protein<br>8B       |
| 42 | 3 | 6.1  | 73   | 7.24E+06 | (R)AVSTGVQAGIPMPCFT<br>TALSFYDGYR(H)  | C:Carbamidomethylation                       | 2809.332 | P52209 | 6-phosphogluconate dehydrogenase,<br>decarboxylating      |

**Table S6: Proteins identified in fraction 1 of cells grown with only As(III), fraction isolated based on Size Exclusion Chromatography (SEC).**

| No | Charge | Score | Peptide Intensity | Total Intensity | Sequence                                | Modifications                                | Matched parent mass | Accession number | Entry name                                                                |
|----|--------|-------|-------------------|-----------------|-----------------------------------------|----------------------------------------------|---------------------|------------------|---------------------------------------------------------------------------|
| 1  | 2      | 19.31 | 92.7              | 2.11E+07        | (K)VVIGMDVAASEFFR(S)                    |                                              | 1540.78             | P06733           | Alpha-enolase                                                             |
| 2  | 2      | 18.85 | 96.8              | 6.33E+06        | (R)ETYEVLLSFIQAALGD<br>QPR(D)           |                                              | 2150.11             | O75643           | U5 small nuclear ribonucleoprotein 200 kDa<br>helicase                    |
| 3  | 3      | 16.93 | 98.2              | 1.22E+07        | (K)NMITGTSQADCAVLIV<br>AAGVGEFEAGISK(N) | C:Carbamidomethylation                       | 2909.44             | P68104           | Elongation factor 1-alpha 1                                               |
| 4  | 3      | 11.23 | 87.3              | 2.16E+08        | (K)ITGMLLEIDNSELLHM<br>LESPELR(S)       |                                              | 2740.39             | P11940           | Polyadenylate-binding protein 1                                           |
| 5  | 3      | 10.61 | 77.5              | 5.42E+06        | (K)QYDADLEQILIQWITT<br>QCR(K)           | C:Carbamidomethylation                       | 2394.18             | P37802           | Transgelin-2                                                              |
| 6  | 3      | 10.03 | 73.6              | 2.94E+07        | (K)GyNPPYCQPKQGAFGS<br>IDDGHLVPTTER(S)  | C:Carbamidomethylation<br>y:Phosphorylated Y | 3100.46             | Q6NVV9           | Putative disintegrin and metalloproteinase<br>domain-containing protein 5 |
| 7  | 2      | 9.16  | 92.4              | 9.41E+06        | (K)KEESEESDDDMGFGLF<br>D(-)             |                                              | 1949.76             | P05386           | 60S acidic ribosomal protein P1                                           |
| 8  | 3      | 9     | 100               | 2.85E+06        | (K)GIEGVQVIPLPGAGEII<br>IADNIIK(F)      |                                              | 2542.49             | P28288           | ATP-binding cassette sub-family D member 3                                |
| 9  | 3      | 8.65  | 72                | 7.00E+06        | (K)LLVSNLDFGVSDADIQ<br>ELFAEFGTLK(K)    |                                              | 2841.46             | Q86V81           | THO complex subunit 4                                                     |
| 10 | 3      | 8.58  | 77.1              | 1.91E+07        | (R)LYVGNIPFGITEEAMM<br>DFFNAQMR(L)      |                                              | 2794.3              | P26368           | Splicing factor U2AF 65 kDa subunit                                       |
| 11 | 3      | 8.22  | 94                | 2.05E+08        | (K)ITGMLLEIDNSELLHM<br>LESPELR(S)       |                                              | 2740.39             | P11940           | Polyadenylate-binding protein 1                                           |

|    |   |      |      |          |                                         |                                                                       |         |        |                                                     |
|----|---|------|------|----------|-----------------------------------------|-----------------------------------------------------------------------|---------|--------|-----------------------------------------------------|
| 12 | 3 | 8.16 | 81.7 | 1.67E+07 | (R)AGTLTVEELGATLTSL<br>LAQAAQAR(A)      |                                                                       | 2513.36 | P58107 | Epiplakin                                           |
| 13 | 3 | 7.96 | 74.9 | 3.43E+06 | (K)MssGGGEKVVLPNDVS<br>VFTTLTINGR(L)    | s:Phosphorylated S                                                    | 2749.46 | Q8WZA2 | Rap guanine nucleotide exchange factor 4            |
| 14 | 2 | 7.89 | 95.5 | 2.80E+06 | (R)GsYGDLLGGPIITTQVTI<br>PK(D)          | s:Phosphorylated S                                                    | 1917.03 | P61978 | Heterogeneous nuclear ribonucleoprotein K           |
| 15 | 3 | 7.43 | 84.3 | 7.20E+06 | (K)MPSFGVSAPGKSMEAS<br>VDVSELK(A)       |                                                                       | 2353.14 | Q8IVF2 | Protein AHNAK2                                      |
| 16 | 3 | 7.42 | 72.9 | 1.41E+07 | (R)HQEIWSILES VWITyQ<br>NSTDVFQR(L)     | y:Phosphorylated Y                                                    | 3092.55 | Q5T5J6 | Transcriptional protein SWT1                        |
| 17 | 3 | 7.34 | 89.6 | 2.77E+06 | (K)FFLEEIQLGEELLAQG<br>EYEK(G)          |                                                                       | 2385.19 | Q15388 | Mitochondrial import receptor subunit TOM20 homolog |
| 18 | 3 | 7.16 | 91.5 | 5.55E+06 | (R)ECGVGVIVTPEQIEEAV<br>EAAINR(H)       | C:Carbamidomethylation                                                | 2483.25 | P47897 | Glutamyl-tRNA synthetase                            |
| 19 | 3 | 7    | 100  | 2.60E+06 | (R)LMPEIYLVEIQCPQV<br>VGGIYGVLNR(K)     | C:Carbamidomethylation                                                | 2989.55 | P13639 | Elongation factor 2                                 |
| 20 | 3 | 6.53 | 74.7 | 3.99E+06 | (R)GsGAGEKPYECADCAK<br>AFGLFsHLVEHR(R)  | C:Carbamidomethylation<br>s:Phosphorylated S                          | 3093.43 | Q96EG3 | Zinc finger protein 837                             |
| 21 | 3 | 6.5  | 100  | 1.20E+07 | (R)GLPFQANAQDIINFFAP<br>LKPVR(I)        |                                                                       | 2456.35 | Q12849 | G-rich sequence factor 1                            |
| 22 | 3 | 6.44 | 72.2 | 6.68E+06 | (K)tVTSSAVCVSPDHDyL<br>AAQPR(K)         | C:Carbamidomethylation<br>t:Phosphorylated<br>T<br>y:Phosphorylated Y | 2387.17 | Q8WVZ9 | Kelch repeat and BTB domain-containing protein 7    |
| 23 | 3 | 6.4  | 81   | 3.95E+06 | (K)QSVQGAGTsyRNVLQA<br>AIQK(S)          | y:Phosphorylated<br>Y<br>s:Phosphorylated S                           | 2119.13 | O15519 | CASP8 and FADD-like apoptosis regulator             |
| 24 | 3 | 6.36 | 80.3 | 3.54E+06 | (K)LTLLGLPTPKTDSYLQL<br>HNKK(R)         |                                                                       | 2267.28 | Q6NUN7 | Uncharacterized protein C11orf63                    |
| 25 | 3 | 6.34 | 80.9 | 3.89E+06 | (R)GsQPPDMASALTDRTS<br>RAPSTYTYTSRPR(A) | s:Phosphorylated S                                                    | 3170.53 | Q86UC2 | Radial spoke head protein 3 homolog                 |
| 26 | 3 | 6.17 | 84.3 | 1.46E+07 | (K)EGPGHMGRsLDQTSPC<br>PLVLVR(I)        | C:Carbamidomethylation<br>s:Phosphorylated S                          | 2406.2  | Q6XZF7 | Dynamin-binding protein                             |

**Table S7: Proteins identified in Fraction 2 of cells grown with only As(III), fraction isolated based on Size Exclusion Chromatography (SEC).**

| No | Charge | Score | Peptide Intensity | Total Intensity | Sequence                      | Modifications | Matched parent mass | Accession number | Entry name                           |
|----|--------|-------|-------------------|-----------------|-------------------------------|---------------|---------------------|------------------|--------------------------------------|
| 1  | 2      | 17.78 | 91.9              | 1.06E+07        | (K)SPYLYPLYGLGELPQGF<br>AR(L) |               | 2141.11             | P31150           | Rab GDP dissociation inhibitor alpha |

|    |   |       |      |          |                                          |                                                                       |         |        |                                                        |
|----|---|-------|------|----------|------------------------------------------|-----------------------------------------------------------------------|---------|--------|--------------------------------------------------------|
| 2  | 2 | 16.51 | 90.7 | 1.91E+07 | (R)YGINTTDIFQTVDLWEG<br>K(N)             |                                                                       | 2100.03 | P37802 | Transgelin-2                                           |
| 3  | 2 | 11.5  | 100  | 3.41E+06 | (K)VVIGMDVAASEFFR(S)                     |                                                                       | 1540.78 | P06733 | Alpha-enolase OS=Homo sapiens GN=ENO1<br>PE=1 SV=2     |
| 4  | 3 | 11.01 | 76.9 | 7.18E+06 | (R)NIQVDEANLLTWQGLI<br>VPDNPYDK(G)       |                                                                       | 2852.45 | P68036 | Ubiquitin-conjugating enzyme E2 L3                     |
| 5  | 3 | 10.76 | 66.1 | 3.79E+08 | (K)SsANAAGGANSGGSSG<br>GASGGGGTDQDRVK(R) | s:Phosphorylated S                                                    | 2651.16 | P41225 | Transcription factor SOX-3                             |
| 6  | 3 | 10.3  | 80.1 | 8.80E+06 | (K)TLVLSNLSYSATEETLQ<br>EVFEK(A)         |                                                                       | 2501.27 | P19338 | Nucleolin                                              |
| 7  | 3 | 9.19  | 60.9 | 1.11E+07 | (R)KGAAPTTPPGKtGPAAQ<br>AGK(Q)           | t:Phosphorylated<br>T<br>s:Phosphorylated S                           | 1791.97 | Q13428 | Treacle protein                                        |
| 8  | 2 | 9.09  | 91.4 | 3.34E+06 | (K)TEFLSFMNTELAATK(<br>N)                |                                                                       | 1849.9  | P31949 | Protein S100-A11                                       |
| 9  | 3 | 9.07  | 69.5 | 2.18E+08 | (R)sGSPSALRVLAEVQEGR<br>AWINPK(E)        | s:Phosphorylated S                                                    | 2465.33 | P49788 | Retinoic acid receptor responder protein 1             |
| 10 | 3 | 8.83  | 65.9 | 1.25E+09 | (K)AAGSTRQPIRGyVQPAD<br>TGHTAK(L)        | y:Phosphorylated Y                                                    | 2382.23 | O95425 | Supervillin                                            |
| 11 | 3 | 8.8   | 73   | 1.93E+08 | (R)LtSLPPKGGTsNGYAKT<br>ASLGGGSR(L)      | t:Phosphorylated<br>T<br>s:Phosphorylated S                           | 2377.25 | Q9UMD9 | Collagen alpha-1(XVII) chain                           |
| 12 | 3 | 8.65  | 76.1 | 2.44E+07 | (R)RELDIGIsAtYCGAHSVP<br>K(G)            | C:Carbamidomethylation<br>t:Phosphorylated<br>T<br>s:Phosphorylated S | 2074.04 | Q96NU7 | Probable imidazolonepropionase                         |
| 13 | 3 | 8.65  | 73   | 3.46E+08 | (R)HPGLAVELELEPALPAE<br>sVTR(V)          | s:Phosphorylated S                                                    | 2228.19 | Q96CD0 | F-box/LRR-repeat protein 8                             |
| 14 | 3 | 8.62  | 65.9 | 1.34E+09 | (R)SSVAAMHWMDGsVVTR<br>EHR(G)            | s:Phosphorylated S                                                    | 2156.01 | P22891 | Vitamin K-dependent protein Z                          |
| 15 | 3 | 8.3   | 71.9 | 5.29E+07 | (R)CRVVAQDsHFtIQTIK(E)                   | C:Carbamidomethylation<br>s:Phosphorylated S                          | 1888.97 | Q8TDY2 | RB1-inducible coiled-coil protein 1                    |
| 16 | 3 | 8.26  | 65.5 | 1.40E+09 | (R)DVYLSPRDDGYSTKDSY<br>SSR(D)           |                                                                       | 2311.05 | P38159 | Heterogeneous nuclear ribonucleoprotein G              |
| 17 | 3 | 8     | 61.7 | 3.31E+08 | (K)MTVCLETEKKSPLSWI<br>EEK(G)            | C:Carbamidomethylation                                                | 2308.16 | P53004 | Biliverdin reductase A                                 |
| 18 | 3 | 7.98  | 65.4 | 1.73E+08 | (R)GPPGPQPPGSPGRAG<br>AVGPGER(G)         | t:Phosphorylated T                                                    | 2153.09 | Q96A84 | EMI domain-containing protein 1                        |
| 19 | 3 | 7.9   | 66   | 2.11E+07 | (R)AGAsPGSRLLPGsPSLLL<br>PAATWR(T)       | s:Phosphorylated S                                                    | 2375.32 | Q495Z4 | Uncharacterized protein C17orf65                       |
| 20 | 3 | 7.87  | 66.4 | 7.32E+08 | (R)RQssVLSQASTAGGDHE<br>EYSNR(E)         | s:Phosphorylated S                                                    | 2379.09 | A8K5M9 | Uncharacterized protein C15orf62,<br>mitochondrial     |
| 21 | 3 | 7.57  | 63.5 | 7.61E+07 | (R)SLSKSDSLLTCSPTED<br>ATMGsR(S)         | C:Carbamidomethylation<br>s:Phosphorylated S                          | 2458.11 | Q92625 | Ankyrin repeat and SAM domain-containing<br>protein 1A |

|    |   |      |      |          |                                      |                                                                       |         |        |                                                                |
|----|---|------|------|----------|--------------------------------------|-----------------------------------------------------------------------|---------|--------|----------------------------------------------------------------|
| 22 | 3 | 7.55 | 69.1 | 8.38E+06 | (K)GSAALGGALALAERSR<br>EGSSQR(M)     | s:Phosphorylated S                                                    | 2231.15 | Q6NZ67 | Mitotic-spindle organizing protein 2B                          |
| 23 | 3 | 7.39 | 60.8 | 2.68E+08 | (R)LPsDSAGIPQAGGEAEP<br>HATAAGK(T)   | s:Phosphorylated S                                                    | 2232.09 | Q99592 | Zinc finger protein 238                                        |
| 24 | 3 | 7.39 | 68   | 4.77E+06 | (R)AKGsVsLEQILPAEEVV<br>R(A)         | s:Phosphorylated S                                                    | 1955.04 | Q13115 | Dual specificity protein phosphatase 4                         |
| 25 | 3 | 7.37 | 63.1 | 5.93E+07 | (K)ENsALAKGSPSSQSIPEK<br>NSK(S)      | s:Phosphorylated S                                                    | 2159.09 | Q9H1H9 | Kinesin-like protein KIF13A                                    |
| 26 | 3 | 7.32 | 71.8 | 5.44E+06 | (K)SSSEEVLERDLGMGDQ<br>KVSSR(G)      |                                                                       | 2309.1  | Q96T83 | Sodium/hydrogen exchanger 7                                    |
| 27 | 3 | 7.31 | 64.9 | 1.06E+08 | (K)TRSSAGVTGTTGLSAKS<br>GtsIPSAGK(T) | t:Phosphorylated<br>T<br>s:Phosphorylated S                           | 2379.25 | Q7Z5P9 | Mucin-19                                                       |
| 28 | 3 | 7.28 | 62.6 | 7.79E+07 | (K)NtQsNEDLKQEKSELEE<br>K(L)         | t:Phosphorylated<br>T<br>s:Phosphorylated S                           | 2149.03 | Q08379 | Golgin subfamily A member 2                                    |
| 29 | 2 | 7.25 | 93.9 | 4.46E+06 | (R)DSSLQDGEFMSMDLR(T)                |                                                                       | 1625.75 | P07737 | Profilin-1                                                     |
| 30 | 3 | 7.25 | 66   | 1.28E+09 | (K)tPEEDVKEVEVDRSETS<br>TSLK(D)      | t:Phosphorylated T                                                    | 2378.16 | Q99715 | Collagen alpha-1(XII) chain                                    |
| 31 | 3 | 7.18 | 61.4 | 2.69E+08 | (R)sPAPGLCPIyKPPETRPA<br>K(W)        | C:Carbamidomethylation<br>y:Phosphorylated<br>Y<br>s:Phosphorylated S | 2079.11 | A2VEC9 | SCO-spondin                                                    |
| 32 | 3 | 7.09 | 62.8 | 4.14E+08 | (K)sIFSKAQVEYLSISEDPK(<br>K)         | s:Phosphorylated S                                                    | 2041.05 | Q6ZRQ5 | Protein MMS22-like                                             |
| 33 | 3 | 7.03 | 79.2 | 1.65E+09 | (R)VsALNsVHCEHVEDEGE<br>SR(Y)        | C:Carbamidomethylation<br>s:Phosphorylated S                          | 2153.95 | Q13085 | Acetyl-CoA carboxylase 1                                       |
| 34 | 3 | 7.02 | 65.8 | 9.56E+06 | (K)sDLEtQISSLNEKLANLN<br>R(K)        | t:Phosphorylated<br>T<br>s:Phosphorylated S                           | 2145.12 | Q9BZF9 | Uveal autoantigen with coiled-coil domains and ankyrin repeats |
| 35 | 3 | 6.97 | 74.9 | 1.47E+08 | (R)stDAPSQSTGDRKTGSV<br>GSWGAAR(G)   | t:Phosphorylated<br>T<br>s:Phosphorylated S                           | 2379.13 | Q9UPQ9 | Trinucleotide repeat-containing gene 6B protein                |
| 36 | 3 | 6.94 | 73.7 | 1.20E+08 | (R)LDVPEGRCASAPARPA<br>LSAPAPR(L)    | C:Carbamidomethylation                                                | 2456.28 | Q9H3T2 | Semaphorin-6C                                                  |
| 37 | 3 | 6.94 | 61.1 | 1.29E+07 | (R)TIPPELQEQLKTVKtLA<br>K(E)         | t:Phosphorylated T                                                    | 2037.2  | Q9H0J4 | Glutamine-rich protein 2                                       |
| 38 | 3 | 6.8  | 68.8 | 1.72E+08 | (K)SNIDIssGLEDEEPPKRPL<br>PRK(Q)     | s:Phosphorylated S                                                    | 2380.25 | Q9BZ71 | Membrane-associated phosphatidylinositol transfer protein 3    |
| 39 | 3 | 6.79 | 66.4 | 9.28E+06 | (K)tRVTGDHVDLTTCPAA<br>GAQQEK(L)     | C:Carbamidomethylation<br>t:Phosphorylated T                          | 2468.22 | Q15828 | Cystatin-M                                                     |
| 40 | 3 | 6.76 | 65.4 | 7.89E+06 | (R)CRRVsEAPsLPVVFDGH<br>YLGGAEK(I)   | C:Carbamidomethylation<br>s:Phosphorylated S                          | 2757.41 | A8MXD5 | Glutaredoxin domain-containing cysteine-rich protein 1         |
| 41 | 3 | 6.67 | 90   | 4.28E+06 | (K)GEDGEMVKLENLFEAL<br>NNK(N)        |                                                                       | 2150.04 | P31944 | Caspase-14                                                     |
| 42 | 3 | 6.57 | 63.3 | 1.19E+08 | (K)HVPGEIGLNYVLMADV                  |                                                                       | 2311.25 | Q13797 | Integrin alpha-9                                               |

|    |   |      |      |          | AKKEK(G)                        |                                                                       |         |        |                                                                |
|----|---|------|------|----------|---------------------------------|-----------------------------------------------------------------------|---------|--------|----------------------------------------------------------------|
| 43 | 3 | 6.56 | 66   | 7.13E+06 | (K)FIGFGtDSWVYpNISIPe<br>HGR(L) | t:Phosphorylated<br>T<br>y:Phosphorylated Y                           | 2392.17 | Q16281 | Cyclic nucleotide-gated cation channel alpha-3                 |
| 44 | 3 | 6.53 | 62   | 4.29E+07 | (MGKGTVsGLVQVVDAET<br>GK(V)     | s:Phosphorylated S                                                    | 1875.98 | Q8IVU5 | Putative uncharacterized protein C3orf46                       |
| 45 | 3 | 6.53 | 69   | 1.15E+08 | (R)APtFSYGPdGNGFSLGCS<br>K(N)   | C:Carbamidomethylation<br>t:Phosphorylated<br>T<br>s:Phosphorylated S | 1961.87 | Q5W0Z9 | Probable palmitoyltransferase ZDHHC20                          |
| 46 | 3 | 6.28 | 64.4 | 1.50E+08 | (R)KLLSAEERISQTVEILK(<br>H)     |                                                                       | 1957.13 | Q99719 | Septin-5                                                       |
| 47 | 3 | 6.27 | 65.3 | 4.54E+08 | (K)sDLEtQISSLNEKLANLN<br>R(K)   | t:Phosphorylated<br>T<br>s:Phosphorylated S                           | 2145.12 | Q9BZF9 | Uveal autoantigen with coiled-coil domains and ankyrin repeats |
| 48 | 3 | 6.26 | 73.5 | 1.42E+08 | (R)AHKGSTLSQWSLNGT<br>PVTsK(G)  | s:Phosphorylated S                                                    | 2156.11 | Q7Z2K6 | Endoplasmic reticulum metalloproteinase 1                      |
| 49 | 3 | 6.21 | 75.1 | 3.76E+07 | (R)VAVFGKDYGGyLsTYIL<br>PAK(G)  | y:Phosphorylated<br>Y<br>s:Phosphorylated S                           | 2162.15 | P42658 | Dipeptidyl aminopeptidase-like protein 6                       |
| 50 | 3 | 6.21 | 63.4 | 9.28E+07 | (K)LTVEEA VRMGIVGPEF<br>KDK(L)  |                                                                       | 2118.13 | Q15149 | Plectin                                                        |
| 51 | 3 | 6.16 | 66.1 | 9.65E+07 | (R)KVHVstVNPnyAGGEPK<br>R(S)    | y:Phosphorylated<br>Y<br>s:Phosphorylated S                           | 1953.03 | P17483 | Homeobox protein Hox-B4                                        |
| 52 | 3 | 6.12 | 68.8 | 2.08E+07 | (R)VYLEGtCVELRRYLE<br>NGK(E)    | C:Carbamidomethylation<br>t:Phosphorylated T                          | 2385.2  | P30455 | HLA class I histocompatibility antigen, A-36 alpha chain       |
| 53 | 3 | 6.12 | 64.7 | 1.09E+07 | (R)ADAtGATGVRLKEGGNI<br>NK(S)   | t:Phosphorylated T                                                    | 1871.99 | Q96L93 | Kinesin-like protein KIF16B                                    |
| 54 | 3 | 6.09 | 72.2 | 2.81E+07 | (R)sLAGMKYHVMANHNSL<br>PILK(A)  | s:Phosphorylated S                                                    | 2224.17 | Q96ME7 | Zinc finger protein 512                                        |
| 55 | 3 | 6.04 | 76.8 | 2.67E+08 | (R)EtPsEEEQAQKQSGMEQ<br>GR(L)   | t:Phosphorylated<br>T<br>s:Phosphorylated S                           | 2148.95 | Q6ZUT6 | Uncharacterized protein C15orf52                               |

**Table S8: Proteins identified in fraction 3 of cells grown with only As(III), fraction isolated based on Size Exclusion Chromatography (SEC).**

| No | Charge | Score | Peptide Intensity | Total Intensity | Sequence                      | Modifications | Accession number | Entry name                             |
|----|--------|-------|-------------------|-----------------|-------------------------------|---------------|------------------|----------------------------------------|
| 1  | 2      | 12.3  | 96.1              | 3.41E+06        | (K)LPIDVTEGEVISLGLPFGK(<br>V) |               | P26599           | Polypyrimidine tract-binding protein 1 |
| 2  | 2      | 10    | 100               | 7.68E+06        | (K)ILLANFLAQTEALMR(G)         |               | P06744           | Glucose-6-phosphate isomerase          |
| 3  | 2      | 9.73  | 94.4              | 1.21E+07        | (R)DSLLQDGEFSMDLR(T)          |               | P07737           | Profilin-1                             |

|    |   |      |      |          |                                    |                                              |        |                                                                                       |
|----|---|------|------|----------|------------------------------------|----------------------------------------------|--------|---------------------------------------------------------------------------------------|
| 4  | 2 | 8.81 | 70.6 | 2.13E+07 | (K)EVSVRTGGLADKsSR(K)              | s:Phosphorylated S                           | P52732 | Kinesin-like protein KIF11                                                            |
| 5  | 3 | 8.76 | 65.4 | 1.58E+06 | (R)GKAyLRNAVvVhGATSGL<br>GK(E)     | t:Phosphorylated<br>T<y:Phosphorylated Y     | Q61AN0 | Dehydrogenase/reductase SDR family member 7B                                          |
| 6  | 2 | 8.63 | 94.1 | 4.49E+06 | (K)ILLANFLAQTEALMR(G)              |                                              | P06744 | Glucose-6-phosphate isomerase                                                         |
| 7  | 3 | 8.45 | 62.9 | 9.61E+07 | (K)NtRNLDPLVYLLSKLTEDK<br>(E)      | t:Phosphorylated T                           | Q9BSJ2 | Gamma-tubulin complex component 2                                                     |
| 8  | 3 | 8.07 | 61   | 3.33E+06 | (K)GKFLINLEGGDIREEsSYK(V)          | s:Phosphorylated S                           | Q9NSE4 | Isoleucyl-tRNA synthetase, mitochondrial                                              |
| 9  | 3 | 8.05 | 62.3 | 1.02E+07 | (R)SKSPAsTSSVNGTPGSQLST<br>PR(S)   | t:Phosphorylated<br>T<br>s:Phosphorylated S  | O15075 | Serine/threonine-protein kinase DCLK1                                                 |
| 10 | 3 | 7.87 | 65.8 | 8.18E+06 | (K)RGITSKVLPLQLENIFYK(L)           |                                              | Q03001 | Dystonin                                                                              |
| 11 | 3 | 7.77 | 64.6 | 7.53E+06 | (R)IQSLEATIEKLLSSEsK(L)            | s:Phosphorylated S                           | Q86TI0 | TBC1 domain family member 1                                                           |
| 12 | 3 | 7.71 | 64.5 | 9.54E+06 | (K)SLRFIDVEFSEPTIILFER(E)          |                                              | Q9Y4K1 | Absent in melanoma 1 protein                                                          |
| 13 | 3 | 7.59 | 62.8 | 7.22E+07 | (K)KMEEEGVSVSEMEATGA<br>QGPSR(V)   |                                              | Q96BT3 | Centromere protein T                                                                  |
| 14 | 3 | 7.57 | 62.6 | 1.34E+07 | (K)NGHANGHLNIGVDIPTPD<br>GSFsIK(I) | s:Phosphorylated S                           | Q86VZ5 | Phosphatidylcholine:ceramide<br>cholinephosphotransferase 1                           |
| 15 | 3 | 7.56 | 61.9 | 1.19E+07 | (K)GKFLINLEGGDIREEsYK(V)           | s:Phosphorylated S                           | Q9NSE4 | Isoleucyl-tRNA synthetase, mitochondrial                                              |
| 16 | 2 | 7.5  | 100  | 1.18E+07 | (R)DSLLQDGEFSMDLR(T)               |                                              | P07737 | Profilin-1                                                                            |
| 17 | 3 | 7.42 | 61.5 | 7.21E+07 | (K)GYTGANQSRMAVSKtVLI<br>PPELK(T)  | t:Phosphorylated T                           | Q5VTH9 | WD repeat-containing protein 78                                                       |
| 18 | 3 | 7.4  | 67.2 | 6.88E+06 | (R)YKASLFtEEEEAEQYKQDLI<br>R(E)    | t:Phosphorylated T                           | O75132 | Zinc finger BED domain-containing protein 4                                           |
| 19 | 3 | 7.3  | 71   | 4.07E+06 | (R)ATNTDLLLAYANLMLLTL<br>STR(D)    |                                              | P49792 | E3 SUMO-protein ligase RanBP2                                                         |
| 20 | 3 | 7.29 | 63.6 | 2.39E+07 | (R)QLNVIDNQRTLSQMSHRL<br>EPR(R)    |                                              | Q8WZA2 | Rap guanine nucleotide exchange factor 4                                              |
| 21 | 3 | 7.23 | 60.3 | 1.47E+07 | (K)SQGSEWRyVLVSTVRTCA<br>K(S)      | C:Carbamidomethylation<br>y:Phosphorylated Y | Q9BYK8 | Peroxisomal proliferator-activated receptor A-<br>interacting complex 285 kDa protein |
| 22 | 3 | 7.15 | 64.6 | 3.22E+06 | (K)sDLEtQISSLNEKLANLNR(K)          | t:Phosphorylated<br>T<br>s:Phosphorylated S  | Q9BZF9 | Uveal autoantigen with coiled-coil domains and<br>ankyrin repeats                     |
| 23 | 3 | 7.05 | 65.6 | 4.40E+06 | (R)SLSKSDSDLLTCSPTEDAT<br>MGsR(S)  | C:Carbamidomethylation<br>s:Phosphorylated S | Q92625 | Ankyrin repeat and SAM domain-containing<br>protein 1A                                |
| 24 | 3 | 7.05 | 60.1 | 3.44E+06 | (K)RREYQSPSEEESEPEAME<br>K(Q)      |                                              | Q9Y468 | Lethal(3)malignant brain tumor-like protein 1                                         |
| 25 | 3 | 7.04 | 67.7 | 6.12E+06 | (K)MsALKQsTSEASVLGER(T)            | s:Phosphorylated S                           | Q8NCK3 | Zinc finger protein 485                                                               |

|    |   |      |      |          |                                      |                                                                       |        |                                                                         |
|----|---|------|------|----------|--------------------------------------|-----------------------------------------------------------------------|--------|-------------------------------------------------------------------------|
| 26 | 3 | 6.82 | 66.2 | 2.92E+06 | (R)IPVNLSAASRPVCLPHEH<br>YFLPGSR(C)  | C:Carbamidomethylation<br>t:Phosphorylated T                          | Q5K4E3 | Polyserase-2                                                            |
| 27 | 3 | 6.81 | 74   | 4.43E+06 | (R)KVRLEPVLPCVAALsSVGt<br>LDR(K)     | C:Carbamidomethylation<br>t:Phosphorylated<br>T<br>s:Phosphorylated S | Q96P50 | Arf-GAP with coiled-coil, ANK repeat and PH domain-containing protein 3 |
| 28 | 3 | 6.73 | 70.9 | 9.06E+06 | (R)StDAPSQsTGDRKTGSVGS<br>WGAAR(G)   | t:Phosphorylated<br>T<br>s:Phosphorylated S                           | Q9UPQ9 | Trinucleotide repeat-containing gene 6B protein                         |
| 29 | 3 | 6.61 | 63   | 6.14E+07 | (K)RGITSKVLPLQLENIFYK(<br>L)         |                                                                       | Q03001 | Dystonin                                                                |
| 30 | 3 | 6.5  | 64.6 | 2.79E+07 | (R)LMVSRPFSVSQDGASQDH<br>R(A)        |                                                                       | Q9Y238 | Deleted in lung and esophageal cancer protein 1                         |
| 31 | 3 | 6.42 | 60.8 | 4.99E+06 | (K)EVVESCRCGNLFFSTNIDD<br>AIK(E)     | C:Carbamidomethylation                                                | O60701 | UDP-glucose 6-dehydrogenase                                             |
| 32 | 3 | 6.28 | 64.2 | 2.25E+06 | (K)MsQQVAELGREtEELRQM<br>IK(I)       | t:Phosphorylated<br>T<br>s:Phosphorylated S                           | Q8NF91 | Nesprin-1                                                               |
| 33 | 3 | 6.19 | 72   | 3.43E+07 | (K)ANGVKPStVHIACTPQAAK<br>AISNK(D)   | C:Carbamidomethylation<br>t:Phosphorylated T                          | Q96FA3 | Protein pellino homolog 1                                               |
| 34 | 3 | 6.06 | 74   | 4.98E+06 | (R)VSEPSGDSSAAGQPLGPAP<br>PPPIRVR(V) |                                                                       | Q96HA7 | Tonsoku-like protein                                                    |
| 35 | 3 | 6.01 | 76   | 6.22E+06 | (K)ENDFKGLTsLyGLILNNNK<br>(L)        | y:Phosphorylated<br>Y<br>s:Phosphorylated S                           | Q9BXN1 | Asporin                                                                 |

**Table S9: Proteins identified in fraction 4 of cells grown with only As(III), fraction isolated based on Size Exclusion Chromatography (SEC).**

| No | Charge | Score | Peptide Intensity | Total Intensity | Sequence                        | Modifications          | Matched parent mass | Accession number | Entry name                      |
|----|--------|-------|-------------------|-----------------|---------------------------------|------------------------|---------------------|------------------|---------------------------------|
| 1  | 2      | 22.91 | 98.6              | 5.08E+06        | (R)VTPVDYLLGVADLTGELM<br>R(M)   |                        | 2062.089            | Q99598           | Translin-associated protein X   |
| 2  | 2      | 20.39 | 98                | 6.58E+06        | (R)DLVEAVAHILGIR(D)             |                        | 1405.816            | P49327           | Fatty acid synthase             |
| 3  | 2      | 19.91 | 98                | 1.27E+07        | (K)IEAELQDICNDVLELLDK(Y<br>)    | C:Carbamidomethylation | 2130.064            | P31946           | 14-3-3 protein beta/alpha       |
| 4  | 2      | 19.84 | 96.2              | 1.82E+07        | (K)ITVVGVGQVGMACAISILG<br>K(S)  | C:Carbamidomethylation | 1973.092            | P07195           | L-lactate dehydrogenase B chain |
| 5  | 2      | 18.65 | 94.6              | 2.57E+07        | (R)LISQIVSSITASLR(F)            |                        | 1487.879            | P68363           | Tubulin alpha-1B chain          |
| 6  | 3      | 17.83 | 95.1              | 8.31E+06        | (R)TLLEGSGLESIIHSLSLAE<br>PR(V) |                        | 2422.319            | P49327           | Fatty acid synthase             |



|    |   |       |      |          |                                      |                        |          |        |                                                                                     |
|----|---|-------|------|----------|--------------------------------------|------------------------|----------|--------|-------------------------------------------------------------------------------------|
| 7  | 3 | 17.66 | 89.8 | 8.68E+06 | (R)LGFESEVELVQMVDGVK(L)              |                        | 1848.978 | P12277 | Creatine kinase B-type                                                              |
| 8  | 3 | 17.39 | 86.1 | 3.32E+07 | (R)YVEPIEDVPCGNIVGLVGV<br>DQFLVK(T)  | C:Carbamidomethylation | 2759.432 | P13639 | Elongation factor 2                                                                 |
| 9  | 2 | 16.95 | 98.8 | 4.18E+06 | (K)DAQVVQVVDGLSNLKM<br>)             |                        | 1811.027 | O00629 | Importin subunit alpha-4                                                            |
| 10 | 3 | 16.86 | 84.6 | 1.18E+07 | (K)KPSETQELVQQVLSLATQ<br>DSDNPDLR(D) |                        | 2911.464 | P63010 | AP-2 complex subunit beta                                                           |
| 11 | 3 | 16.64 | 73.4 | 7.91E+06 | (K)LGCEVLGVSVDSQFTHLA<br>WINTPR(K)   | C:Carbamidomethylation | 2699.361 | P32119 | Peroxiredoxin-2                                                                     |
| 12 | 3 | 16.55 | 84.6 | 6.35E+07 | (R)IYDDDDFFQNLGVDANALDN<br>VDAR(M)   |                        | 2600.19  | P22314 | Ubiquitin-like modifier-activating<br>enzyme 1                                      |
| 13 | 2 | 16.37 | 96   | 2.76E+07 | (R)AQLGVQAFADALLIIPK(V)              |                        | 1768.037 | P40227 | T-complex protein 1 subunit zeta                                                    |
| 14 | 2 | 15.69 | 86.8 | 7.60E+06 | (R)ILSISADIETIGEILK(K)               |                        | 1714.984 | P61978 | Heterogeneous nuclear<br>ribonucleoprotein K                                        |
| 15 | 2 | 15    | 91.5 | 4.28E+06 | (R)DQEGQDVLLFIDNIFR(F)               |                        | 1921.965 | P06576 | ATP synthase subunit beta,<br>mitochondrial                                         |
| 16 | 3 | 14.64 | 80.3 | 3.63E+07 | (R)NDFQLIGIQDGYLSLLQDS<br>GEVR(E)    |                        | 2580.294 | P63241 | Eukaryotic translation initiation<br>factor 5A-1                                    |
| 17 | 2 | 14.5  | 84.5 | 1.03E+07 | (K)LIIVSNPVDILTYVAWK(L)              |                        | 1944.121 | Q9BYZ2 | L-lactate dehydrogenase A-like 6B                                                   |
| 18 | 3 | 14.43 | 97.5 | 1.60E+07 | (R)TLLEGSGLESIIHSLSLAE<br>PR(V)      |                        | 2422.319 | P49327 | Fatty acid synthase                                                                 |
| 19 | 3 | 14.35 | 83.1 | 1.33E+07 | (R)ALDLFSDNAPPELLEIINE<br>DIAK(R)    |                        | 2637.366 | Q15084 | Protein disulfide-isomerase A6                                                      |
| 20 | 2 | 14.11 | 88.1 | 2.46E+07 | (R)AQLGVQAFADALLIIPK(V)              |                        | 1768.037 | P40227 | T-complex protein 1 subunit zeta                                                    |
| 21 | 3 | 13.1  | 80.2 | 8.51E+07 | (K)DGPLNMILDDGGDLTNLIH<br>TK(Y)      |                        | 2252.123 | P23526 | Adenosylhomocysteinase                                                              |
| 22 | 2 | 12.58 | 93   | 8.62E+06 | (K)ETPFELIEALLK(Y)                   |                        | 1402.783 | Q08211 | ATP-dependent RNA helicase A                                                        |
| 23 | 3 | 12.53 | 92.1 | 2.94E+06 | (K)FGVEQDVMVFASFIR(K)                |                        | 1859.9   | P14618 | Pyruvate kinase isozymes M1/M2                                                      |
| 24 | 3 | 12.52 | 79   | 5.59E+06 | (R)ECGVGVIVTPEQIEEAVEA<br>AINR(H)    | C:Carbamidomethylation | 2483.245 | P47897 | Glutaminyl-tRNA synthetase                                                          |
| 25 | 3 | 12.48 | 92.7 | 2.57E+07 | (K)DAFDRNPELQNLDDDFK<br>(S)          |                        | 2310.14  | P52209 | 6-phosphogluconate dehydrogenase,<br>decarboxylating                                |
| 26 | 3 | 12.36 | 96.9 | 1.07E+07 | (K)DSLDPSTHAMQLLTAEIE<br>K(I)        |                        | 2246.101 | Q07666 | KH domain-containing, RNA-<br>binding, signal transduction-<br>associated protein 1 |
| 27 | 2 | 11.64 | 77.6 | 6.19E+06 | (R)LISQIVSSITASLR(F)                 |                        | 1487.879 | P68363 | Tubulin alpha-1B chain                                                              |

|    |   |       |      |          |                                                    |                                                                       |          |        |                                                         |
|----|---|-------|------|----------|----------------------------------------------------|-----------------------------------------------------------------------|----------|--------|---------------------------------------------------------|
| 28 | 3 | 11.47 | 81.3 | 1.16E+07 | (K)SLQDIIALGMDELSEEDKL<br>TVSR(A)                  |                                                                       | 2675.381 | P06576 | ATP synthase subunit beta,<br>mitochondrial             |
| 29 | 2 | 11.26 | 83.9 | 1.38E+07 | (K)ITVVGVGQVGMACAISILG<br>K(S)                     | C:Carbamidomethylation                                                | 1973.092 | P07195 | L-lactate dehydrogenase B chain                         |
| 30 | 3 | 11.05 | 83.7 | 3.05E+07 | (R)NDFQLIGIQDGYLSLLQDS<br>GEVR(E)                  |                                                                       | 2580.294 | P63241 | Eukaryotic translation initiation<br>factor 5A-1        |
| 31 | 2 | 10.96 | 97.9 | 3.91E+06 | (K)SLELLPIILTALATK(K)                              |                                                                       | 1595.998 | Q9NVII | Fanconi anemia group I protein                          |
| 32 | 3 | 10.93 | 73.8 | 1.34E+07 | (R)KFDVNTSAVQVLIEHIGNL<br>DR(A)                    |                                                                       | 2368.262 | Q00610 | Clathrin heavy chain 1                                  |
| 33 | 3 | 10.84 | 80.5 | 2.92E+07 | (K)DGPLNMILDDGGDLTNLIH<br>TK(Y)                    |                                                                       | 2252.123 | P23526 | Adenosylhomocysteinase                                  |
| 34 | 3 | 10.68 | 62.6 | 7.23E+06 | (K)Q <sup>t</sup> PLSATAAPQTPDSDIFTF<br>SVsLEIK(E) | t:Phosphorylated<br>T<br>s:Phosphorylated S                           | 2864.456 | Q9Y3P9 | Rab GTPase-activating protein 1                         |
| 35 | 3 | 10.51 | 78.1 | 6.49E+06 | (K)sVDECKLHKGGyNGLNQC<br>LPTMQSK(M)                | C:Carbamidomethylation<br>y:Phosphorylated<br>Y<br>s:Phosphorylated S | 2864.349 | Q8TD23 | Zinc finger protein 675                                 |
| 36 | 3 | 10.47 | 70.3 | 7.67E+06 | (K)FFEGPVTGIFSGYVNSMLQ<br>EYAK(N)                  |                                                                       | 2584.243 | P55060 | Exportin-2                                              |
| 37 | 3 | 10.14 | 79.9 | 6.51E+06 | (K)KPTETQELVQQVLSLATQ<br>DSDNPDLR(D)               |                                                                       | 2925.48  | Q10567 | AP-1 complex subunit beta-1                             |
| 38 | 3 | 10.03 | 83.3 | 2.53E+07 | (R)IVAFADA AVEPIDFPIAPVY<br>AASMVLK(D)             |                                                                       | 2818.51  | P24752 | Acetyl-CoA acetyltransferase,<br>mitochondrial          |
| 39 | 3 | 9.85  | 80.3 | 9.78E+06 | (K)HFADLLPGFLQAVNDSCY<br>QNDDSVLK(S)               | C:Carbamidomethylation                                                | 2966.399 | O00410 | Importin-5                                              |
| 40 | 3 | 9.48  | 99.4 | 3.03E+07 | (R)RLNGLSsSVEYNIMELEQE<br>LENVKTLK(T)              | s:Phosphorylated S                                                    | 3136.619 | Q8WVP7 | Limb region 1 protein homolog                           |
| 41 | 3 | 9.47  | 69.4 | 1.17E+07 | (K)YLEsKEDVADALLQTDQSL<br>sEK(E)                   | s:Phosphorylated S                                                    | 2482.22  | P32456 | Interferon-induced guanylate-<br>binding protein 2      |
| 42 | 3 | 9.39  | 84.7 | 9.26E+06 | (K)EQPLDEELKDAFQNAYLE<br>LGGLGER(V)                |                                                                       | 2834.384 | P05023 | Sodium/potassium-transporting<br>ATPase subunit alpha-1 |
| 43 | 2 | 9.35  | 78.3 | 8.22E+06 | (K)SLADELALVDVLEDK(L)                              |                                                                       | 1629.858 | P07195 | L-lactate dehydrogenase B chain                         |
| 44 | 3 | 9.11  | 80.8 | 1.16E+08 | (K)GLDYEGGGCRFLRyDCVIS<br>SPR(K)                   | C:Carbamidomethylation<br>y:Phosphorylated Y                          | 2577.197 | O60568 | Procollagen-lysine,2-oxoglutarate 5-<br>dioxygenase 3   |

|    |   |      |      |          |                                                           |                                              |          |        |                                                                                |
|----|---|------|------|----------|-----------------------------------------------------------|----------------------------------------------|----------|--------|--------------------------------------------------------------------------------|
| 45 | 2 | 8.97 | 87.1 | 9.65E+06 | (R)LGfSEVELVQMvVDGvK(L)                                   |                                              | 1848.978 | P12277 | Creatine kinase B-type                                                         |
| 46 | 3 | 8.67 | 75.6 | 2.55E+07 | (R)IVAFADAaVEPIDFPIAPvY<br>AASmVLK(D)                     |                                              | 2818.51  | P24752 | Acetyl-CoA acetyltransferase,<br>mitochondrial                                 |
| 47 | 3 | 8.61 | 78.1 | 7.05E+06 | (R)NDFQLIGIQDGYLSLLQDS<br>GEvR(E)                         |                                              | 2580.294 | P63241 | Eukaryotic translation initiation<br>factor 5A-1                               |
| 48 | 3 | 8.53 | 85.9 | 2.07E+06 | (K)DAQvVQvVLDGLSNILK(M<br>)                               |                                              | 1811.027 | O00629 | Importin subunit alpha-4                                                       |
| 49 | 2 | 8.33 | 83.7 | 2.74E+07 | (K)MAvTFIGNSTAIQELFK(R)                                   |                                              | 1869.978 | P07437 | Tubulin beta chain                                                             |
| 50 | 3 | 8.26 | 63.2 | 1.60E+07 | (R)tCEGTEPWSRTTSLGDSL<br>N<br>AHSAAEK(A)                  | C:Carbamidomethylation<br>t:Phosphorylated T | 2805.274 | Q13796 | Protein Shroom2                                                                |
| 51 | 3 | 8.23 | 94.1 | 3.25E+06 | (K)LIvSNPVDILTYvAWK(L)                                    |                                              | 1944.121 | Q9BYZ2 | L-lactate dehydrogenase A-like 6B                                              |
| 52 | 3 | 8.16 | 90.1 | 4.74E+06 | (R)TLLEGSGLESIIHSSLAE<br>PR(V)                            |                                              | 2422.319 | P49327 | Fatty acid synthase                                                            |
| 53 | 3 | 8.04 | 72.9 | 1.18E+07 | (K)SLQDHAILGMDELSEEDKL<br>TVSR(A)                         |                                              | 2675.381 | P06576 | ATP synthase subunit beta,<br>mitochondrial                                    |
| 54 | 3 | 7.84 | 81.5 | 4.48E+06 | (K)EMSPFS <sub>sss</sub> STTHLFSK(C)                      | s:Phosphorylated S                           | 1772.816 | Q8N8D9 | Uncharacterized protein C5orf56                                                |
| 55 | 3 | 7.83 | 62.9 | 2.52E+07 | (R)ANLTILFDKYLPTCLDTLR(<br>T)                             | C:Carbamidomethylation                       | 2267.21  | Q9NYC9 | Dynein heavy chain 9, axonemal                                                 |
| 56 | 3 | 7.74 | 86.6 | 3.94E+06 | (K)STAI <sub>SLFYELSEN</sub> DLNFIK(<br>Q)                |                                              | 2204.112 | P13639 | Elongation factor 2                                                            |
| 57 | 3 | 7.73 | 63.4 | 1.64E+07 | (K)KISFNfSEIMAsTGWNSL<br>K(L)                             | s:Phosphorylated S                           | 2289.122 | Q8TAL5 | Uncharacterized protein C9orf43                                                |
| 58 | 2 | 7.73 | 89.2 | 1.08E+07 | (R)HLvFPLLEFLSVK(E)                                       |                                              | 1541.909 | P60228 | Eukaryotic translation initiation<br>factor 3 subunit E                        |
| 59 | 3 | 7.68 | 63   | 9.66E+06 | (K)ISSNEQPPAAWPPRQDMG <sub>s</sub><br>GLFGQR(W)           | s:Phosphorylated S                           | 2726.31  | Q8N944 | Protein FAM123C                                                                |
| 60 | 3 | 7.67 | 64.4 | 1.94E+07 | (R)LPLKLSHVQSQ <sub>t</sub> NGGPSPT<br>PK(A)              | t:Phosphorylated T                           | 2186.193 | Q6PJG9 | Leucine-rich repeat and fibronectin<br>type-III domain-containing protein<br>4 |
| 61 | 3 | 7.61 | 79.1 | 3.95E+06 | (R)FDPTQFQDCHQGLTETGT<br>DLEAVAK(F)                       | C:Carbamidomethylation                       | 2897.387 | Q7L1Q6 | Basic leucine zipper and W2<br>domain-containing protein 1                     |
| 62 | 3 | 7.53 | 63.9 | 8.08E+06 | (K)vA <sub>y</sub> vQLAHGQ <sub>t</sub> FTFPDLFP<br>EK(D) | t:Phosphorylated<br>T<br>y:Phosphorylated Y  | 2408.229 | Q16540 | 39S ribosomal protein L23,<br>mitochondrial                                    |
| 63 | 2 | 7.5  | 100  | 6.81E+06 | (R)AQLGVQAFADALLIPK(V)                                    |                                              | 1768.037 | P40227 | T-complex protein 1 subunit zeta                                               |
| 64 | 2 | 7.48 | 88.3 | 3.04E+07 | (K)MAvTFIGNSTAIQELFK(R)                                   |                                              | 1869.978 | P07437 | Tubulin beta chain                                                             |

|    |   |      |      |          |                                          |                                                                       |          |        |                                                                           |
|----|---|------|------|----------|------------------------------------------|-----------------------------------------------------------------------|----------|--------|---------------------------------------------------------------------------|
| 65 | 3 | 7.44 | 63.2 | 6.62E+06 | (R)ITRSQPNHTPAGPPGPSSNP<br>VsNGKEt(R)    | t:Phosphorylated<br>T<br>s:Phosphorylated S                           | 2883.446 | Q9BQ15 | SOSS complex subunit B1                                                   |
| 66 | 2 | 7.37 | 62.6 | 1.06E+07 | (R)ANCINLPGWyHCECR(D)                    | C:Carbamidomethylation<br>y:Phosphorylated Y                          | 1949.82  | Q99435 | Protein kinase C-binding protein<br>NELL2                                 |
| 67 | 2 | 7.3  | 80.2 | 6.36E+06 | (R)AQLGVQAFADALLIIPK(V)                  |                                                                       | 1768.037 | P40227 | T-complex protein 1 subunit zeta                                          |
| 68 | 3 | 7.26 | 82.9 | 6.64E+06 | (R)TTFLLQLEALEAVFAQtH<br>YPDVFTR(E)      | t:Phosphorylated T                                                    | 3026.526 | A6NNA5 | Dorsal root ganglia homeobox<br>protein                                   |
| 69 | 2 | 7.22 | 93.3 | 3.41E+07 | (K)MAVTFIGNSTAIQELFK(R)                  |                                                                       | 1869.978 | P07437 | Tubulin beta chain                                                        |
| 70 | 3 | 7.12 | 77.7 | 2.50E+07 | (R)INALTAASEAACLIVSDET<br>IK(N)          | C:Carbamidomethylation                                                | 2289.201 | Q99832 | T-complex protein 1 subunit eta                                           |
| 71 | 3 | 7.06 | 91.1 | 2.19E+06 | (R)TVPPAVTGITFLSGGQSEE<br>EASINLNAINK(C) |                                                                       | 3057.574 | P04075 | Fructose-bisphosphate aldolase A<br>OS=Homo sapiens GN=ALDOA<br>PE=1 SV=2 |
| 72 | 3 | 7.06 | 83.4 | 2.34E+07 | (R)KLEGDSTDLSQIAELQAQ<br>IAELK(M)        |                                                                       | 2615.341 | P35579 | Myosin-9                                                                  |
| 73 | 3 | 7.06 | 86.5 | 6.78E+06 | (K)ICEEETGSTSQAADSTAVN<br>GSITPtDKK(I)   | C:Carbamidomethylation<br>t:Phosphorylated T                          | 3010.416 | Q49A26 | Putative oxidoreductase GLYR1                                             |
| 74 | 2 | 7.01 | 64.2 | 4.26E+06 | (R)LLEsMKAQyVAGNGFR(K)                   | y:Phosphorylated<br>Y<br>s:Phosphorylated S                           | 1783.916 | Q9UJX5 | Anaphase-promoting complex<br>subunit 4                                   |
| 75 | 3 | 6.96 | 61.9 | 2.67E+07 | (K)tHGCPEWREECSFELPPGA<br>LDGLLR(A)      | C:Carbamidomethylation<br>t:Phosphorylated T                          | 2926.361 | Q9BXF6 | Rab11 family-interacting protein 5                                        |
| 76 | 3 | 6.94 | 96   | 1.40E+07 | (R)ILADLEDYLNELWEDKEG<br>K(K)            |                                                                       | 2293.123 | Q99613 | Eukaryotic translation initiation<br>factor 3 subunit C                   |
| 77 | 3 | 6.93 | 78.7 | 2.54E+07 | (R)TLQSGLALLYGFLPDFDW<br>KK(I)           |                                                                       | 2312.233 | Q8TE99 | Acid phosphatase-like protein 2                                           |
| 78 | 3 | 6.85 | 76.7 | 2.77E+06 | (R)AMERGGTVPADLEAAAAS<br>LPssKEYAELK(K)  | s:Phosphorylated S                                                    | 2898.488 | Q9Y6D9 | Mitotic spindle assembly checkpoint<br>protein MAD1                       |
| 79 | 3 | 6.81 | 92.6 | 4.33E+06 | (K)LESEKLNVAEVtQSEIAQK<br>QK(L)          | t:Phosphorylated T                                                    | 2372.267 | Q9NVD7 | Alpha-parvin                                                              |
| 80 | 3 | 6.76 | 82.8 | 3.82E+06 | (K)DFLTLCEKtSTGEKLSEFN<br>QsEK(I)        | C:Carbamidomethylation<br>t:Phosphorylated<br>T<br>s:Phosphorylated S | 2691.282 | Q9BUY5 | Zinc finger protein 426                                                   |

|    |   |      |      |          |                                     |                                                                       |          |        |                                                                         |
|----|---|------|------|----------|-------------------------------------|-----------------------------------------------------------------------|----------|--------|-------------------------------------------------------------------------|
| 81 | 3 | 6.66 | 79.4 | 5.35E+06 | (R)LYKSNELFGSVIFKLPsNR(S)           | s:Phosphorylated S                                                    | 2212.213 | Q86UK0 | ATP-binding cassette sub-family A member 12                             |
| 82 | 2 | 6.61 | 79.1 | 4.72E+06 | (R)NTsLSETSRGGQPSVtK(S)             | t:Phosphorylated<br>T<br>s:Phosphorylated S                           | 1849.925 | Q12955 | Ankyrin-3                                                               |
| 83 | 2 | 6.57 | 88.3 | 8.98E+06 | (K)ITVVGVGQVGMACAISILGK(S)          | C:Carbamidomethylation                                                | 1973.092 | P07195 | L-lactate dehydrogenase B chain                                         |
| 84 | 3 | 6.56 | 74.7 | 4.90E+06 | (R)VVNPKAFSTAGSSGSDEsHVAAPPDICsR(T) | C:Carbamidomethylation<br>s:Phosphorylated S                          | 3014.427 | Q9H3L0 | Methylmalonic aciduria and homocystinuria type D protein, mitochondrial |
| 85 | 3 | 6.55 | 70.4 | 3.28E+06 | (K)TASMLWLLQQEMVtWRLLASLYRDR(I)     | t:Phosphorylated T                                                    | 3080.617 | P57740 | Nuclear pore complex protein Nup107                                     |
| 86 | 3 | 6.5  | 100  | 5.16E+06 | (R)AVSIFNKEGCLEIVLKYLSR(F)          | C:Carbamidomethylation                                                | 2339.279 | Q7Z4Q2 | HEAT repeat-containing protein 3                                        |
| 87 | 3 | 6.5  | 100  | 4.97E+06 | (R)TLLESGLESIIHSILAEPR(V)           |                                                                       | 2422.319 | P49327 | Fatty acid synthase                                                     |
| 88 | 3 | 6.46 | 80.7 | 1.21E+07 | (K)LLtVCKPFDLHASPHAsIK(R)           | C:Carbamidomethylation<br>t:Phosphorylated<br>T<br>s:Phosphorylated S | 2134.148 | Q3B820 | Protein FAM161A                                                         |
| 89 | 3 | 6.46 | 82.2 | 3.55E+06 | (R)KCsELLYVFQtQLALKLLQCLK(V)        | C:Carbamidomethylation<br>t:Phosphorylated<br>T<br>s:Phosphorylated S | 2696.488 | Q86VV8 | Rotatin                                                                 |
| 90 | 3 | 6.37 | 89.5 | 9.10E+06 | (R)IETLEQKLtCLELIQNTHSQSCLK(S)      | C:Carbamidomethylation<br>t:Phosphorylated T                          | 2886.47  | Q9BYW2 | Histone-lysine N-methyltransferase SETD2                                |
| 91 | 3 | 6.3  | 70.5 | 3.47E+06 | (R)DyLEANIDAIHRSTDHIEEsVR(E)        | y:Phosphorylated<br>Y<br>s:Phosphorylated S                           | 2583.243 | Q9NQ75 | Cas scaffolding protein family member 4                                 |
| 92 | 3 | 6.29 | 85.7 | 1.38E+07 | (R)IWLKDKHLALQFIDWVLR(G)            |                                                                       | 2294.317 | Q15849 | Urea transporter 2                                                      |
| 93 | 3 | 6.29 | 94   | 5.63E+06 | (R)EVAFAQFGSDLDAAATQQLLSR(G)        |                                                                       | 2338.167 | P25705 | ATP synthase subunit alpha, mitochondrial                               |
| 94 | 3 | 6.25 | 69.4 | 2.69E+07 | (R)VLGyEVLYWTDDsKEsMIGKIR(V)        | s:Phosphorylated S                                                    | 2602.322 | Q9UQ52 | Contactin-6                                                             |
| 95 | 3 | 6.24 | 67.2 | 1.49E+07 | (R)KsQLIISPHSTTELPVLFYPSALGR(A)     | s:Phosphorylated S                                                    | 2754.519 | A6PW82 | Putative uncharacterized protein CXorf30                                |

|     |   |      |      |          |                                      |                                              |          |        |                                  |
|-----|---|------|------|----------|--------------------------------------|----------------------------------------------|----------|--------|----------------------------------|
| 96  | 3 | 6.21 | 65.1 | 5.98E+06 | (K)QCGsCWAfSATGALEGQM<br>FRKTGK(L)   | C:Carbamidomethylation<br>s:Phosphorylated S | 2678.227 | O60911 | Cathepsin L2                     |
| 97  | 3 | 6.19 | 65.2 | 1.23E+07 | (R)MEAMEKQIASLIGLVQSAL<br>LR(G)      | t:Phosphorylated T                           | 2289.231 | Q9C0H9 | SRC kinase signaling inhibitor 1 |
| 98  | 2 | 6.17 | 89.6 | 6.54E+06 | (R)ASVRIRsSVEILR(V)                  | s:Phosphorylated S                           | 1485.886 | Q8N960 | Centrosomal protein of 120 kDa   |
| 99  | 3 | 6.08 | 78.8 | 3.23E+06 | (R)SGTGSGGSTPHISGPGPGR<br>PSSKEGR(R) |                                              | 2407.171 | Q9H165 | B-cell lymphoma/leukemia 11A     |
| 100 | 2 | 6.08 | 71.3 | 7.30E+06 | (K)TQHGVLsQQFVELINK(C)               | s:Phosphorylated S                           | 1840.992 | Q12846 | Syntaxin-4                       |

**Table S10: Proteins identified in fraction 1 of cells grown with SeMet, fraction isolated based on Size Exclusion Chromatography (SEC).**

| No | Charge | Score | Peptide Intensity | Total Intensity | Sequence                            | Modifications          | Matched parent mass | Accession number | Entry name                                          |
|----|--------|-------|-------------------|-----------------|-------------------------------------|------------------------|---------------------|------------------|-----------------------------------------------------|
| 1  | 3      | 21.32 | 97.5              | 3.79E+08        | (K)ITGMILLEIDNSELLHMLESPESLR(S)     |                        | 2740.39             | P11940           | Polyadenylate-binding protein 1                     |
| 2  | 2      | 21.25 | 97.5              | 8.82E+07        | (K)VVIGMDVAASEFFR(S)                |                        | 1540.783            | P06733           | Alpha-enolase                                       |
| 3  | 2      | 17.83 | 85.6              | 5.18E+06        | (R)ETYEVLsSFIQAALGDQPR(D)           |                        | 2150.113            | O75643           | U5 small nuclear ribonucleoprotein 200 kDa helicase |
| 4  | 3      | 15.51 | 64.9              | 1.68E+07        | (K)NMITGTSQADCAVLIVAAGVGEFEAGISK(N) | C:Carbamidomethylation | 2909.438            | P68104           | Elongation factor 1-alpha 1                         |
| 5  | 3      | 13.34 | 96.6              | 9.87E+06        | (K)NLEVLNFFNNQIEELPTQISSLQK(L)      |                        | 2818.462            | Q15404           | Ras suppressor protein 1                            |
| 6  | 2      | 11.99 | 92.1              | 5.36E+06        | (R)GPGTSFEFALAIVEALNGK(E)           |                        | 1921.007            | Q99497           | Protein DJ-1                                        |
| 7  | 3      | 11    | 100               | 1.77E+07        | (K)EALAQCVLAEIPQQVVGyFNTYK(L)       | C:Carbamidomethylation | 2641.333            | O75131           | Copine-3                                            |
| 8  | 3      | 10.67 | 75.1              | 1.62E+07        | (R)QSGAFLSTSEGLILQLVGDAVHPQFK(E)    |                        | 2742.446            | Q96AB3           | Isochorismatase domain-                             |

|    |   |      |      |          |                                                               |                                             |          |        |                                                                 |
|----|---|------|------|----------|---------------------------------------------------------------|---------------------------------------------|----------|--------|-----------------------------------------------------------------|
|    |   |      |      |          |                                                               |                                             |          |        | containing protein 2,<br>mitochondrial                          |
| 9  | 2 | 9.96 | 89.2 | 1.51E+07 | (K)KEESEESDDDMGFGLFD(-)                                       |                                             | 1949.759 | P05386 | 60S acidic ribosomal<br>protein P1                              |
| 10 | 3 | 9.13 | 72.8 | 2.45E+07 | (K)NSDPFAHSKDA <sub>s</sub> ST <sub>s</sub> SGQSGSKNEGDEER(G) | s:Phosphorylated S                          | 3011.285 | Q9Y2I7 | 1-phosphatidylinositol-3-<br>phosphate 5-kinase                 |
| 11 | 3 | 9    | 100  | 2.62E+06 | (R)QVTITGSAASISLAQYLINVR(L)                                   |                                             | 2205.224 | Q15366 | Poly(rC)-binding protein 2                                      |
| 12 | 3 | 8.74 | 90.6 | 5.99E+06 | (K)NMITGTSQADCAVLIVAAGVGEFEAGISK(N)                           | C:Carbamidomethylation                      | 2909.438 | P68104 | Elongation factor 1-alpha 1                                     |
| 13 | 3 | 8.59 | 75.4 | 7.17E+06 | (R)FDPTQFQDCIQGLTETGTDLEAVAK(F)                               | C:Carbamidomethylation                      | 2897.387 | Q7L1Q6 | Basic leucine zipper and<br>W2 domain-containing<br>protein 1   |
| 14 | 2 | 8.45 | 84.8 | 4.96E+06 | (R)GPGTSFEFALAIVEALNGK(E)                                     |                                             | 1921.007 | Q99497 | Protein DJ-1                                                    |
| 15 | 2 | 8.27 | 83   | 3.93E+06 | (K)VADGKSVtGTDVDIVFsK(V)                                      | t:Phosphorylated<br>T<br>s:Phosphorylated S | 1837.954 | Q9BW30 | Tubulin polymerization-<br>promoting protein family<br>member 3 |
| 16 | 3 | 8.12 | 65.5 | 1.10E+07 | (K)IYPLHELALWQPLHAD <sub>s</sub> GF <sub>s</sub> KISK(T)      | s:Phosphorylated S                          | 2750.466 | Q9NVR7 | TBCC domain-containing<br>protein 1                             |
| 17 | 3 | 8.09 | 93.3 | 1.05E+07 | (R)ALDLFSDNAPPELLEIINEDIAK(R)                                 |                                             | 2637.366 | Q15084 | Protein disulfide-isomerase<br>A6                               |
| 18 | 3 | 7.6  | 67   | 3.17E+06 | (-)MANLERtFIAIKPDGVQRGLVGEIHK(R)                              | t:Phosphorylated T                          | 2868.613 | P22392 | Nucleoside diphosphate<br>kinase B                              |
| 19 | 2 | 7.5  | 100  | 2.29E+06 | (K)SSsPAPADIAQTVQEDLR(T)                                      | s:Phosphorylated S                          | 1884.93  | Q13283 | Ras GTPase-activating<br>protein-binding protein 1              |
| 20 | 2 | 7.44 | 86.5 | 3.70E+06 | (R)ILSISADIETIGEILK(K)                                        |                                             | 1714.984 | P61978 | Heterogeneous nuclear<br>ribonucleoprotein K                    |
| 21 | 3 | 7.25 | 81.9 | 1.70E+07 | (K)EALAQCVLAEIPQVVGYFNTYK(L)                                  | C:Carbamidomethylation                      | 2641.333 | O75131 | Copine-3                                                        |

|    |   |      |      |          |                                   |                                              |          |        |                                                           |
|----|---|------|------|----------|-----------------------------------|----------------------------------------------|----------|--------|-----------------------------------------------------------|
| 22 | 3 | 7.14 | 70.3 | 8.20E+06 | (K)sHQEKTSNFNAAsLK(F)             | s:Phosphorylated S                           | 1864.017 | P02748 | Complement component C9                                   |
| 23 | 3 | 7    | 81.8 | 9.58E+06 | (R)IFLLGLsIKLNGYLQRAILEEsR(Q)     | s:Phosphorylated S                           | 2646.534 | O43825 | Beta-1,3-galactosyltransferase 2                          |
| 24 | 2 | 6.85 | 78.7 | 6.39E+06 | (R)DSLLQDGEFSMDLR(T)              |                                              | 1625.748 | P07737 | Profilin-1                                                |
| 25 | 2 | 6.85 | 89.3 | 2.83E+06 | (K)GYTSWAIGLSVADLAESIMK(N)        |                                              | 2112.068 | P00338 | L-lactate dehydrogenase A chain                           |
| 26 | 3 | 6.79 | 91.9 | 1.00E+07 | (R)TLLEGSGLESIIHSSLAEP(R)         |                                              | 2422.319 | P49327 | Fatty acid synthase                                       |
| 27 | 3 | 6.77 | 79.6 | 7.14E+06 | (K)MADALLFGNFGVQNITAAIQLYESLAK(E) |                                              | 2898.507 | Q5TEA6 | Protein sel-1 homolog 2                                   |
| 28 | 3 | 6.5  | 100  | 3.17E+06 | (R)FNIDLVSKLLysQGLLIDLLIK(S)      | y:Phosphorylated Y<br>s:Phosphorylated S     | 2518.49  | P26374 | Rab proteins geranylgeranyltransferase component A 2      |
| 29 | 3 | 6.41 | 80   | 5.05E+06 | (K)LQNLLSELEAGLGIVLRRSDtNLtK(L)   | t:Phosphorylated T                           | 2753.552 | Q8NCM8 | Cytoplasmic dynein 2 heavy chain 1                        |
| 30 | 3 | 6.39 | 93.2 | 8.09E+06 | (R)GLPFQANAQDIINFFAPLKPVR(I)      |                                              | 2456.345 | Q12849 | G-rich sequence factor 1                                  |
| 31 | 3 | 6.39 | 94.4 | 8.96E+06 | (R)FQKGRIEFENVHFsYADGR(E)         | y:Phosphorylated Y<br>s:Phosphorylated S     | 2300.121 | Q9NP58 | ATP-binding cassette sub-family B member 6, mitochondrial |
| 32 | 3 | 6.38 | 86.8 | 3.64E+08 | (K)ITGMLEIDNSELLHMLESPELR(S)      |                                              | 2740.39  | P11940 | Polyadenylate-binding protein 1                           |
| 33 | 3 | 6.28 | 72.3 | 6.37E+07 | (K)VLGSSIHMECKVSGSLPIsAQWFK(D)    | C:Carbamidomethylation<br>s:Phosphorylated S | 2661.353 | Q8WZ42 | Titin                                                     |
| 34 | 3 | 6.2  | 67.9 | 4.52E+06 | (K)DQNYVEIMGRDVQESLKNGSAtGGGNK(V) | t:Phosphorylated T                           | 2867.359 | Q13416 | Origin recognition complex subunit 2                      |
| 35 | 3 | 6.2  | 83.8 | 6.18E+06 | (K)QLNHFWWEIVVQDGITLTK(E)         |                                              | 2254.223 | P13010 | X-ray repair cross-complementing protein 5                |



|    |   |      |      |          |                                   |                    |          |        |                                 |
|----|---|------|------|----------|-----------------------------------|--------------------|----------|--------|---------------------------------|
| 36 | 2 | 6.15 | 76.8 | 3.37E+06 | (R)SAtRGEIITPKTDtGR(S)            | t:Phosphorylated T | 1702.908 | Q8TDW5 | Synaptotagmin-like protein 5    |
| 37 | 3 | 6.11 | 72   | 6.64E+06 | (R)RDGGVPADPDNIyLTTGASDGISTILK(I) | y:Phosphorylated Y | 2746.389 | Q8TD30 | Alanine aminotransferase 2      |
| 38 | 3 | 6.04 | 79.1 | 6.67E+06 | (R)EWTEQETLLLLLEALEMYKDDWVK(V)    |                    | 2897.391 | Q92922 | SWI/SNF complex subunit SMARCC1 |

**Table S11: Proteins identified in fraction 2 of cells grown with SeMet, fraction isolated based on Size Exclusion Chromatography (SEC).**

| No | Charge | Score | Peptide Intensity | Total Intensity | Sequence                       | Modifications                                                         | Matched parent mass | Accession number | Entry name                                      |
|----|--------|-------|-------------------|-----------------|--------------------------------|-----------------------------------------------------------------------|---------------------|------------------|-------------------------------------------------|
| 1  | 2      | 17.34 | 97.9              | 8.15E+06        | (K)DATNVGDEGGFAPNILENK(E)      |                                                                       | 1960.925            | P06733           | Alpha-enolase                                   |
| 2  | 3      | 16.59 | 89.3              | 9.96E+06        | (K)AGAAPYVQAFDSLLAGPVAEYLK(I)  |                                                                       | 2351.228            | Q01518           | Adenylyl cyclase-associated protein 1           |
| 3  | 2      | 16.47 | 88.8              | 1.09E+07        | (K)SPYLYPLYGLGELPQGFAR(L)      |                                                                       | 2141.107            | P31150           | Rab GDP dissociation inhibitor alpha            |
| 4  | 2      | 10    | 100               | 1.17E+07        | (R)YGINTTDIFQTVDLWEGK(N)       |                                                                       | 2100.028            | P37802           | Transgelin-2                                    |
| 5  | 3      | 9.9   | 79.6              | 4.84E+06        | (K)TLVLSNLSYSATEETLQEVFEK(A)   |                                                                       | 2501.266            | P19338           | Nucleolin                                       |
| 6  | 3      | 9.44  | 86.3              | 7.12E+06        | (R)YVEPIEDVPCGNIVGLVVDQFLVK(T) | C:Carbamidomethylation                                                | 2759.432            | P13639           | Elongation factor 2                             |
| 7  | 3      | 8.82  | 61.1              | 4.94E+08        | (K)GKGsTCAFTECILRSyGLK(T)      | C:Carbamidomethylation<br>y:Phosphorylated<br>Y<br>s:Phosphorylated S | 2148.058            | Q05932           | Folypolyglutamate synthase, mitochondrial       |
| 8  | 3      | 8.47  | 69.2              | 1.93E+07        | (K)EDsCTASSKNYKNASGVVNSSPR(S)  | C:Carbamidomethylation<br>s:Phosphorylated S                          | 2458.126            | Q8N5G2           | Macoilin                                        |
| 9  | 3      | 8.42  | 63                | 1.95E+09        | (R)AHKGSTLSQWSLGNtPVTSK(G)     | t:Phosphorylated T                                                    | 2156.11             | Q7Z2K6           | Endoplasmic reticulum metalloproteinase 1       |
| 10 | 3      | 8.41  | 61.1              | 5.72E+07        | (R)GLEELHLEGLFPQELAR(A)        |                                                                       | 1951.028            | Q6NSJ5           | Leucine-rich repeat-containing protein 8E       |
| 11 | 3      | 8.26  | 70.4              | 6.29E+07        | (K)DVGAKVTGFsEGVVDsVK(G)       | s:Phosphorylated S                                                    | 1793.928            | O94876           | Transmembrane and coiled-coil domains protein 1 |

|    |   |      |      |          |                                  |                                                                    |          |        |                                                     |
|----|---|------|------|----------|----------------------------------|--------------------------------------------------------------------|----------|--------|-----------------------------------------------------|
| 12 | 3 | 8.25 | 64.1 | 3.97E+08 | (R)ELEKsQRSQIsSVNSDVEALR(R)      | s:Phosphorylated S                                                 | 2375.216 | Q6WCQ1 | Myosin phosphatase Rho-interacting protein          |
| 13 | 3 | 8.18 | 61.5 | 8.42E+06 | (R)GLPGPPGPQGESRTGPPGsTGsR(G)    | s:Phosphorylated S                                                 | 2146.064 | Q99715 | Collagen alpha-1(XII) chain                         |
| 14 | 3 | 7.95 | 66.3 | 4.45E+08 | (R)VKVMtDLGSGPITLLtDRR(Y)        | t:Phosphorylated T                                                 | 2072.153 | P25391 | Laminin subunit alpha-1                             |
| 15 | 3 | 7.89 | 62.9 | 1.15E+08 | (R)GPQGSVHFAAIRtSDAGRyR(C)       | t:Phosphorylated T<br>y:Phosphorylated Y                           | 2146.09  | Q8NDA2 | Hemicentin-2                                        |
| 16 | 3 | 7.62 | 62   | 4.99E+06 | (K)HSGFSTSDNSIANtPDYSGNMK(S)     | t:Phosphorylated T                                                 | 2458.058 | Q9Y216 | Myotubularin-related protein 7                      |
| 17 | 3 | 7.58 | 66.5 | 1.66E+08 | (K)ISAARFFQLLDRQPPIsVYnAGEK(W)   | t:Phosphorylated T<br>y:Phosphorylated Y                           | 2821.499 | O95342 | Bile salt export pump                               |
| 18 | 3 | 7.57 | 61.6 | 3.18E+07 | (K)VNPDLQVEVKPSIRARK(I)          |                                                                    | 1949.129 | Q96KR1 | Zinc finger RNA-binding protein                     |
| 19 | 3 | 7.45 | 63.4 | 5.10E+06 | (R)sLLESVQKLDLEATIDKVVK(I)       | s:Phosphorylated S                                                 | 2228.275 | Q13535 | Serine/threonine-protein kinase ATR                 |
| 20 | 3 | 7.41 | 69.6 | 1.02E+08 | (K)ALyNCIHEDMKRLLPVVR(A)         | C:Carbamidomethylation<br>y:Phosphorylated Y                       | 2227.184 | Q9NZJ4 | Sacsin                                              |
| 21 | 2 | 7.27 | 75.1 | 7.12E+06 | (R)DSLLQDGEFSMDLR(T)             |                                                                    | 1625.748 | P07737 | Profilin-1                                          |
| 22 | 3 | 7.17 | 73.1 | 3.85E+06 | (K)KAVKNFTEVHPDyGsHIQALLDK(Y)    | y:Phosphorylated Y<br>s:Phosphorylated S                           | 2610.367 | P04040 | Catalase                                            |
| 23 | 3 | 7.14 | 60.2 | 1.23E+09 | (K)LSTSAPKGLTKVNICMSR(I)         | C:Carbamidomethylation                                             | 1963.046 | Q9NP80 | Calcium-independent phospholipase A2-gamma          |
| 24 | 3 | 6.94 | 63.5 | 4.88E+06 | (K)SLIEGVIsGYNATVFAYGPTGCGK(T)   | C:Carbamidomethylation<br>s:Phosphorylated S                       | 2461.207 | Q2TAC6 | Kinesin-like protein KIF19                          |
| 25 | 3 | 6.89 | 67.9 | 2.79E+06 | (-)MGKEQELLEAARTGHLPVEK(L)       |                                                                    | 2307.213 | Q92625 | Ankyrin repeat and SAM domain-containing protein 1A |
| 26 | 3 | 6.88 | 68.7 | 7.03E+08 | (R)DGGIPADPNNVFLsTGASDAIVtVLK(L) | t:Phosphorylated T<br>s:Phosphorylated S                           | 2571.33  | P24298 | Alanine aminotransferase 1                          |
| 27 | 3 | 6.85 | 60.7 | 8.30E+07 | (R)tVCVPRTVGMPCsPCPQGR(Y)        | C:Carbamidomethylation<br>t:Phosphorylated T<br>s:Phosphorylated S | 2158.998 | Q14532 | Keratin, type I cuticular Ha2                       |
| 28 | 3 | 6.79 | 65.5 | 9.39E+07 | (R)FASRIIDSLFNtVtDKK(I)          | t:Phosphorylated T                                                 | 1955.06  | O60701 | UDP-glucose 6-dehydrogenase                         |
| 29 | 3 | 6.79 | 89.8 | 3.97E+06 | (R)GLPFQANAQDIINFFAPLKPVR(I)     |                                                                    | 2456.345 | Q12849 | G-rich sequence factor 1                            |
| 30 | 3 | 6.78 | 75.9 | 6.62E+08 | (R)DyPAGVTCVWHIVAPKNQLIELK(F)    | C:Carbamidomethylation<br>y:Phosphorylated Y                       | 2651.401 | Q9UKZ9 | Procollagen C-endopeptidase enhancer 2              |
| 31 | 3 | 6.78 | 60.3 | 3.62E+06 | (K)QMNIPEGDRstPAAVGAMEDK(S)      | t:Phosphorylated T<br>s:Phosphorylated S                           | 2145.006 | Q9UGI8 | Testin                                              |
| 32 | 3 | 6.69 | 63   | 5.46E+07 | (K)RLRsSSSsLSSSGAPSPK(G)         | s:Phosphorylated S                                                 | 1790.936 | Q6RI45 | Bromodomain and WD repeat-containing protein 3      |
| 33 | 3 | 6.64 | 65.9 | 6.44E+06 | (R)SsHGIRSSGTSSGVLMVGPnFR(V)     | s:Phosphorylated S                                                 | 2233.114 | P78368 | Casein kinase I isoform gamma-2                     |

|    |   |      |      |          |                              |                                              |          |        |                                                                |
|----|---|------|------|----------|------------------------------|----------------------------------------------|----------|--------|----------------------------------------------------------------|
| 34 | 3 | 6.62 | 71.6 | 3.26E+07 | (R)SPSQGGsFSQVIFTNKSLGKR(D)  | s:Phosphorylated S                           | 2225.167 | Q8NF99 | Zinc finger protein 397                                        |
| 35 | 3 | 6.55 | 80.8 | 4.25E+08 | (K)EFtNVyIKNFGEEVDDESLK(E)   | t:Phosphorylated<br>T<br>y:Phosphorylated Y  | 2376.124 | Q13310 | Polyadenylate-binding protein 4                                |
| 36 | 3 | 6.5  | 68.7 | 1.01E+08 | (K)AAMYsVEITVEKDKVTGETR(V)   | s:Phosphorylated S                           | 2227.128 | O75781 | Paralemmin                                                     |
| 37 | 3 | 6.49 | 81.5 | 1.34E+08 | (R)HLWNHSIIIEEFVSLVtGCCYR(L) | C:Carbamidomethylation<br>t:Phosphorylated T | 2749.286 | Q15021 | Condensin complex subunit 1                                    |
| 38 | 3 | 6.49 | 71   | 7.77E+07 | (R)GHAAFTSDPKPtIEVSGKK(Y)    | t:Phosphorylated T                           | 1970.034 | P00390 | Glutathione reductase, mitochondrial                           |
| 39 | 3 | 6.48 | 62.7 | 3.76E+07 | (K)AsDPGAASTKSGKAsTLsR(R)    | s:Phosphorylated S                           | 1791.92  | Q86VM9 | Zinc finger CCCH domain-containing protein 18                  |
| 40 | 3 | 6.42 | 73.6 | 5.27E+06 | (K)sDLEtQISSLNEKLANLNR(K)    | t:Phosphorylated<br>T<br>s:Phosphorylated S  | 2145.115 | Q9BZF9 | Uveal autoantigen with coiled-coil domains and ankyrin repeats |
| 41 | 3 | 6.34 | 63.7 | 7.60E+08 | (K)sPyLGLGPGHSYVSLFLADR(C)   | y:Phosphorylated<br>Y<br>s:Phosphorylated S  | 2149.108 | O15091 | Mitochondrial ribonuclease P protein 3                         |
| 42 | 3 | 6.32 | 61.7 | 2.14E+08 | (R)KtAIAsVSTLRNNEPNSQSK(F)   | t:Phosphorylated<br>T<br>s:Phosphorylated S  | 2145.126 | Q9H7T0 | Cation channel sperm-associated protein subunit beta           |
| 43 | 3 | 6.29 | 66.1 | 2.77E+08 | (R)KVHVstVNPNyAGGEPKR(S)     | y:Phosphorylated<br>Y<br>s:Phosphorylated S  | 1953.03  | P17483 | Homeobox protein Hox-B4                                        |
| 44 | 3 | 6.29 | 60.4 | 3.18E+06 | (R)VsVFKCPCSPLLFAQKR(T)      | C:Carbamidomethylation<br>s:Phosphorylated S | 2037.077 | Q8N1G0 | Zinc finger protein 687                                        |
| 45 | 3 | 6.17 | 68.1 | 5.40E+07 | (K)LHCDsLETQIKSLHSENVK(L)    | C:Carbamidomethylation<br>s:Phosphorylated S | 2238.118 | Q5T0U0 | Coiled-coil domain-containing protein 122                      |
| 46 | 3 | 6.06 | 65.7 | 4.81E+06 | (K)MTVCLETEKKSPLSWIEEK(G)    | C:Carbamidomethylation                       | 2308.156 | P53004 | Biliverdin reductase A                                         |
| 47 | 3 | 6.06 | 60.1 | 2.52E+06 | (R)GTMyRRLQEFDGAVEDFLK(V)    | y:Phosphorylated Y                           | 2275.118 | Q8NEE8 | Tetratricopeptide repeat protein 16                            |
| 48 | 3 | 6.05 | 71.6 | 1.72E+06 | (R)KyVIPTFWPTPKER(K)         | y:Phosphorylated Y                           | 1875.053 | Q9H295 | Transmembrane 7 superfamily member 4                           |

**Table S12: Proteins identified in fraction 3 of cells grown with SeMet, fraction isolated based on Size Exclusion Chromatography (SEC).**

| No | Charge | Score | Peptide Intensity | Total Intensity | Sequence                 | Modifications | Matched parent mass | Accession number | Entry name                    |
|----|--------|-------|-------------------|-----------------|--------------------------|---------------|---------------------|------------------|-------------------------------|
| 1  | 2      | 16.58 | 85.7              | 5.58E+07        | (K)ILLANFLAQTEALMR(G)    |               | 1703.951            | P06744           | Glucose-6-phosphate isomerase |
| 2  | 2      | 12.54 | 89.9              | 4.68E+06        | (R)YGINTTDIFQTVDLWEGK(N) |               | 2100.028            | P37802           | Transgelin-2                  |

|    |   |      |      |          |                                 |                                              |          |        |                                                                |
|----|---|------|------|----------|---------------------------------|----------------------------------------------|----------|--------|----------------------------------------------------------------|
| 3  | 3 | 9.98 | 68.5 | 1.04E+08 | (R)RQREVtEITEIEEEEYEISK(H)      | t:Phosphorylated T                           | 2381.183 | Q8WZ42 | Titin                                                          |
| 4  | 3 | 9.03 | 66.2 | 8.07E+07 | (K)LTVEEAVRMGIVGPEFKDK(L)       |                                              | 2118.126 | Q15149 | Plectin                                                        |
| 5  | 3 | 8.76 | 68   | 9.26E+06 | (K)QsDIMMRDNLFEIVTTSR(T)        | s:Phosphorylated S                           | 2156.048 | Q9HB21 | Pleckstrin homology domain-containing family A member 1        |
| 6  | 3 | 8.3  | 60.6 | 6.89E+07 | (K)GYTSWSLLDKFEWEKGYsDR(Y)      | s:Phosphorylated S                           | 2467.157 | Q6UWM7 | Lactase-like protein                                           |
| 7  | 3 | 8.29 | 70.1 | 5.63E+07 | (K)GKFLINLEGGDIREESsYK(V)       | s:Phosphorylated S                           | 2155.103 | Q9NSE4 | Isoleucyl-tRNA synthetase, mitochondrial                       |
| 8  | 3 | 8.27 | 63.1 | 1.90E+07 | (R)GPGPKGPVGtVSEAQLARR(L)       | t:Phosphorylated T                           | 1877.035 | Q9NZM1 | Myoferlin                                                      |
| 9  | 3 | 8.21 | 68.6 | 4.49E+08 | (R)LRRAADHDVGSSELPPEGVLGALLR(V) |                                              | 2541.39  | Q9UHG2 | ProSAAS                                                        |
| 10 | 2 | 8.12 | 90.2 | 1.42E+07 | (K)ILLANFLAQTEALMR(G)           |                                              | 1703.951 | P06744 | Glucose-6-phosphate isomerase                                  |
| 11 | 3 | 7.98 | 69.5 | 7.78E+06 | (K)sDLEtQISSLNEKLANLNR(K)       | t:Phosphorylated T<br><br>s:Phosphorylated S | 2145.115 | Q9BZF9 | Uveal autoantigen with coiled-coil domains and ankyrin repeats |
| 12 | 2 | 7.97 | 86.9 | 2.29E+06 | (R)VVPSDLYPLVLGFLR(D)           |                                              | 1687.978 | Q14978 | Nucleolar and coiled-body phosphoprotein 1                     |
| 13 | 3 | 7.92 | 62.9 | 4.69E+06 | (R)MNsNERVRIIsGSPLGSLAR(S)      | s:Phosphorylated S                           | 2157.156 | Q9BXL7 | Caspase recruitment domain-containing protein 11               |
| 14 | 3 | 7.89 | 67.8 | 5.99E+06 | (R)LAKPVLCLGTLCTAFLTGLNR(V)     | C:Carbamidomethylation                       | 2318.272 | Q8TBJ4 | Lipid phosphate phosphatase-related protein type 1             |
| 15 | 3 | 7.86 | 73.7 | 1.56E+07 | (K)HGAALQRSLTELDGLKIPSESGEK(L)  |                                              | 2536.337 | Q969R2 | Oxysterol-binding protein 2                                    |
| 16 | 3 | 7.72 | 65.7 | 1.06E+09 | (K)AAsLPGKNGNPTFAAVTAGyDK(S)    | y:Phosphorylated Y<br><br>s:Phosphorylated S | 2150.088 | Q92545 |                                                                |
| 17 | 3 | 7.69 | 71.1 | 5.50E+06 | (R)LAGDQGSEEAPQRPPASSAtLR(R)    | t:Phosphorylated T                           | 2238.111 | Q9NPG4 | Protocadherin-12                                               |
| 18 | 3 | 7.68 | 62.3 | 2.31E+07 | (R)GALsKGSSESLtLMFSHEDQKK(I)    | t:Phosphorylated T<br><br>s:Phosphorylated S | 2293.149 | Q8N3K9 | Cardiomyopathy-associated protein 5                            |
| 19 | 3 | 7.63 | 64.2 | 7.14E+06 | (R)SELRLDLVLPsGQsFRWR(E)        | s:Phosphorylated S                           | 2159.172 | O15527 | N-glycosylase/DNA lyase                                        |

|    |   |      |      |          |                                 |                                                                       |          |        |                                                                            |
|----|---|------|------|----------|---------------------------------|-----------------------------------------------------------------------|----------|--------|----------------------------------------------------------------------------|
| 20 | 3 | 7.6  | 68.4 | 1.55E+06 | (R)IsPGNQyIVSVSADGAILR(W)       | y:Phosphorylated<br>Y<br>s:Phosphorylated S                           | 1960.05  | Q8N1V2 | WD repeat-containing protein 16                                            |
| 21 | 3 | 7.53 | 63.8 | 3.15E+06 | (K)IGTRSAEDPVSEVPAVsQHPR(T)     | s:Phosphorylated S                                                    | 2232.137 | P25054 | Adenomatous polyposis coli protein                                         |
| 22 | 3 | 7.53 | 67.7 | 2.68E+06 | (K)tVQtAAANAASTAASSAAQNAFK(G)   | t:Phosphorylated T                                                    | 2152.063 | O15126 | Secretory carrier-associated membrane protein 1                            |
| 24 | 3 | 7.43 | 63.8 | 8.72E+06 | (K)HATENKVKNLTEEMAGLDETIK(L)    |                                                                       | 2542.282 | P12882 | Myosin-1                                                                   |
| 25 | 3 | 7.29 | 71.5 | 3.20E+06 | (R)DAGCRPYMAPERIDPsAsR(Q)       | C:Carbamidomethylation<br>s:Phosphorylated S                          | 2148.991 | P45985 | Dual specificity mitogen-activated protein kinase 4                        |
| 26 | 2 | 7.14 | 73.1 | 3.24E+07 | (K)DVNLEVTAKPVPLNsGVR(F)        | s:Phosphorylated S                                                    | 1908.055 | Q13287 | N-myc-interactor                                                           |
| 27 | 3 | 7.03 | 82.2 | 1.01E+07 | (R)AGPAPKGSsLQVTFPSETLNLSEK(C)  | s:Phosphorylated S                                                    | 2458.282 | P35408 | Prostaglandin E2 receptor EP4 subtype                                      |
| 28 | 3 | 6.97 | 61.5 | 1.11E+08 | (R)GDINVCIVGDPstAKSQFLK(H)      | C:Carbamidomethylation<br>t:Phosphorylated<br>T<br>s:Phosphorylated S | 2149.096 | Q14566 | DNA replication licensing factor MCM6                                      |
| 29 | 3 | 6.95 | 60.1 | 5.86E+07 | (R)GLGMTLSYLFREPATINYPFEK(G)    |                                                                       | 2547.295 | O00217 | NADH dehydrogenase [ubiquinone] iron-sulfur protein 8, mitochondrial       |
| 30 | 3 | 6.82 | 63.5 | 8.59E+06 | (R)FGKyIDIyFNPSGVIEGAR(I)       | y:Phosphorylated Y                                                    | 2146.097 | Q6PIF6 | Myosin-VIIb                                                                |
| 31 | 3 | 6.77 | 64.5 | 5.48E+07 | (K)FDPNERYLHLAAKLLDAK(E)        |                                                                       | 2114.139 | Q7Z478 | ATP-dependent RNA helicase DHX29                                           |
| 32 | 3 | 6.71 | 68.3 | 5.58E+06 | (R)EESTNLEDYEPNtVAsLLK(Q)       | t:Phosphorylated<br>T<br>s:Phosphorylated S                           | 2152.029 | Q15311 | RalA-binding protein 1                                                     |
| 33 | 3 | 6.61 | 63.9 | 2.34E+07 | (K)DSDDDSDDEQEKKPEAPKLSK(K)     | s:Phosphorylated S                                                    | 2463.101 | Q13435 | Splicing factor 3B subunit 2                                               |
| 34 | 3 | 6.46 | 74   | 3.39E+07 | (K)KKGSLSDNDSDCPysEK(V)         | C:Carbamidomethylation<br>y:Phosphorylated<br>Y<br>s:Phosphorylated S | 2159.903 | Q9Y6R1 | Electrogenic sodium bicarbonate cotransporter 1                            |
| 35 | 3 | 6.45 | 65.6 | 1.40E+07 | (R)ADAPDAGAQSSELPSYHQNDVSLDR(G) |                                                                       | 2758.219 | Q92538 | Golgi-specific brefeldin A-resistance guanine nucleotide exchange factor 1 |
| 36 | 3 | 6.35 | 62.3 | 5.15E+06 | (K)RREYQSPSEEESEPEAMEK(Q)       |                                                                       | 2311.014 | Q9Y468 | Lethal(3)malignant brain tumor-like protein 1                              |
| 37 | 2 | 6.33 | 62.5 | 1.53E+07 | (R)DSLLQDGEFSMDLR(T)            |                                                                       | 1625.748 | P07737 | Profilin-1                                                                 |

|    |   |      |      |          |                               |                        |          |        |                                             |
|----|---|------|------|----------|-------------------------------|------------------------|----------|--------|---------------------------------------------|
| 38 | 3 | 6.23 | 69.7 | 3.06E+07 | (K)HSTyKYGRPDEIIEERIQTK(A)    | y:Phosphorylated Y     | 2463.263 | Q8NA23 | WD repeat-containing protein 31             |
| 39 | 3 | 6.23 | 68.3 | 6.67E+06 | (K)QEALQHLIRssGKLILLDK(L)     | s:Phosphorylated S     | 2162.266 | O14646 | Chromodomain-helicase-DNA-binding protein 1 |
| 40 | 3 | 6.09 | 64.3 | 4.16E+06 | (K)FWMTWKALGTLGLEERVNR(A)     |                        | 2307.207 | Q6ZQY3 | Glutamate decarboxylase-like protein 1      |
| 41 | 3 | 6.05 | 69.4 | 1.04E+07 | (K)SFLLNHLLQGLPGLEsGEGGRPR(G) | s:Phosphorylated S     | 2447.315 | Q9ULX5 | RING finger protein 112                     |
| 42 | 3 | 6.01 | 70.1 | 1.25E+08 | (K)MREGDELCGQEEAFRTWAK(K)     | C:Carbamidomethylation | 2313.039 | P29475 | Nitric oxide synthase, brain                |

**Table S13: Proteins identified in fraction 4 of cells grown with SeMet, fraction isolated based on Size Exclusion Chromatography (SEC).**
